# Supplementary material for: Adapting a club-based medication delivery strategy to a hypertension context: the CLUBMEDS Study in Nigeria
Source: PubMed Central journal article supplement — BMJ Open. 2019 Jul 9;9(7):e029824. doi: 10.1136/bmjopen-2019-029824 (PMC6629410; doi:10.1136/bmjopen-2019-029824), 2019-07-09
Supplement: bmjopen-2019-029824.draft_revisions.pdf [file bmjopen-2019-029824.draft_revisions.pdf]

# BMJ Open

BMJ Open is committed to open peer review. As part of this commitment we make the peer review history of every article we publish publicly available.

When an article is published we post the peer reviewers' comments and the authors' responses online. We also post the versions of the paper that were used during peer review. These are the versions that the peer review comments apply to.

The versions of the paper that follow are the versions that were submitted during the peer review process. They are not the versions of record or the final published versions. They should not be cited or distributed as the published version of this manuscript.

BMJ Open is an open access journal and the full, final, typeset and author-corrected version of record of the manuscript is available on our site with no access controls, subscription charges or pay-per-view fees (<http://bmjopen.bmj.com>).

If you have any questions on BMJ Open's open peer review process please email [info.bmjopen@bmj.com](mailto:info.bmjopen@bmj.com)

# BMJ Open

## Adapting a club-based medication delivery strategy to a hypertension context: The CLUBMEDS Study in Nigeria

|                               |                                                                                                                                                                                                                                                                                                                                                                                                                                                                                                                                                                                                                                                                                                                                                                                                              |
|-------------------------------|--------------------------------------------------------------------------------------------------------------------------------------------------------------------------------------------------------------------------------------------------------------------------------------------------------------------------------------------------------------------------------------------------------------------------------------------------------------------------------------------------------------------------------------------------------------------------------------------------------------------------------------------------------------------------------------------------------------------------------------------------------------------------------------------------------------|
| Journal:                      | <i>BMJ Open</i>                                                                                                                                                                                                                                                                                                                                                                                                                                                                                                                                                                                                                                                                                                                                                                                              |
| Manuscript ID                 | bmjopen-2019-029824                                                                                                                                                                                                                                                                                                                                                                                                                                                                                                                                                                                                                                                                                                                                                                                          |
| Article Type:                 | Protocol                                                                                                                                                                                                                                                                                                                                                                                                                                                                                                                                                                                                                                                                                                                                                                                                     |
| Date Submitted by the Author: | 13-Feb-2019                                                                                                                                                                                                                                                                                                                                                                                                                                                                                                                                                                                                                                                                                                                                                                                                  |
| Complete List of Authors:     | Santo, Karla ; University of Sydney, Westmead Applied Research Centre, Faculty of Medicine and Health; The George Institute for Global Health, Cardiovascular Division<br>ISIGUZO, Godsent; University of Cape Town, Medicine; Federal teaching Hospital Abakaliki , Medicine<br>Atkins, Emily; The George Institute for Global Health, Cardiovascular Division<br>Mishra, Shiva; The University of Queensland, Division of Epidemiology and Biostatistics, Faculty of Medicine; Nepal Development Society<br>Panda, Rajmohan; Public Health Foundation of India, research<br>Mbau, Lilian; Amref Health Africa<br>Fayomi, Samuel; Primary Health Centre Awkuzu<br>Ugwu, Collins; Federal Teaching Hospital Abakaliki<br>Odili, Augustine; University of Abuja<br>Virani, Salim; Baylor College of Medicine, |
| Keywords:                     | Medication adherence, Peer-support groups, Adherence clubs, Hypertension < CARDIOLOGY, Anti-hypertensives                                                                                                                                                                                                                                                                                                                                                                                                                                                                                                                                                                                                                                                                                                    |
|                               |                                                                                                                                                                                                                                                                                                                                                                                                                                                                                                                                                                                                                                                                                                                                                                                                              |

SCHOLARONE™  
Manuscripts

1  
2  
3 1 **TITLE**  
4  
5

6 2 Adapting a club-based medication delivery strategy to a hypertension context: The  
7  
8 3 CLUBMEDS Study in Nigeria  
9  
10

11 4 **AUTHORS**  
12  
13

14 5 Karla Santo<sup>1,2</sup>  
15

16 6 Godsent Isiguzo<sup>3,4</sup>  
17

18 7 Emily R. Atkins<sup>1</sup>  
19

20 8 Shiva Raj Mishra<sup>5,6</sup>  
21

22 9 Raj Panda<sup>7</sup>  
23

24 10 Lilian Mbau<sup>8</sup>  
25

26 11 Samuel B. Fayomi<sup>9</sup>  
27

28 12 Collins Ugwu<sup>4</sup>  
29

30 13 Augustine Odili<sup>10</sup>  
31

32 14 Salim S. Virani<sup>11</sup>  
33  
34  
35  
36  
37  
38  
39

40 16 **AFFILIATIONS**  
41

42 17 1. The George Institute for Global Health, University of New South Wales, Sydney,  
43  
44 18 Australia

45 19 2. Westmead Applied Research Centre, Faculty of Medicine and Health, The University  
46  
47 20 of Sydney, Sydney, Australia

48 21 3. University of Cape Town, Cape Town, South Africa  
49

50 22 4. Federal Teaching Hospital Abakaliki, Abakaliki, Nigeria  
51

52 23 5. Division of Epidemiology and Biostatistics, Faculty of Medicine, The University of  
53  
54 24 Queensland, Brisbane, Australia  
55  
56  
57  
58  
59  
60

- 1
- 2
- 3 25 6. Nepal Development Society, Bharatpur, Nepal
- 4
- 5 26 7. Public Health Foundation of India, New Delhi, India
- 6
- 7 27 8. Amref Health Africa, Nairobi, Kenya
- 8
- 9 28 9. Primary Health Centre Awkuzu, Awkuzu, Nigeria
- 10
- 11 29 10. University of Abuja, Abuja, Nigeria
- 12
- 13 30 11. Michael E. DeBakey Veterans Affairs Medical Center & Baylor College of Medicine,
- 14
- 15 31 Houston, United States of America
- 16
- 17
- 18
- 19
- 20
- 21
- 22

### 23 33 **CORRESPONDING AUTHOR**

24 34 Karla Santo

25 35 Westmead Applied Research Centre, The University of Sydney at Westmead Hospital, PO Box  
26 36 154, Westmead, NSW 2154, Australia

27 37 Email: [ksanto@georgeinstitute.org.au](mailto:ksanto@georgeinstitute.org.au)

28 38 Phone: +61 2 8052 4620

29 39

30 40 **WORD COUNT: 3939 (max. 4000) – Excluding title page, abstract, strengths and**  
31 41 **limitations, tables, figures, declarations and references.**

32 42 **BOXES: 1**

33 43 **FIGURES: 1**

34 44

35 45

1  
2  
3 **46 ABSTRACT**  
4  
5

6 **47 INTRODUCTION:** The prevalence of hypertension in sub-Saharan Africa (SSA) is among  
7  
8  
9  
10  
11  
12  
13  
14  
15  
16  
17  
18  
19  
20  
21  
22  
23  
24  
25  
26  
27  
28  
29  
30  
31  
32  
33  
34  
35  
36  
37  
38  
39  
40  
41  
42  
43  
44  
45  
46  
47  
48  
49  
50  
51  
52  
53  
54  
55  
56  
57  
58  
59  
60  
61  
62  
63  
64  
65  
66  
67  
68  
69  
70  
71  
72  
73  
74  
75  
76  
77  
78  
79  
80  
81  
82  
83  
84  
85  
86  
87  
88  
89  
90  
91  
92  
93  
94  
95  
96  
97  
98  
99  
100  
101  
102  
103  
104  
105  
106  
107  
108  
109  
110  
111  
112  
113  
114  
115  
116  
117  
118  
119  
120  
121  
122  
123  
124  
125  
126  
127  
128  
129  
130  
131  
132  
133  
134  
135  
136  
137  
138  
139  
140  
141  
142  
143  
144  
145  
146  
147  
148  
149  
150  
151  
152  
153  
154  
155  
156  
157  
158  
159  
160  
161  
162  
163  
164  
165  
166  
167  
168  
169  
170  
171  
172  
173  
174  
175  
176  
177  
178  
179  
180  
181  
182  
183  
184  
185  
186  
187  
188  
189  
190  
191  
192  
193  
194  
195  
196  
197  
198  
199  
200  
201  
202  
203  
204  
205  
206  
207  
208  
209  
210  
211  
212  
213  
214  
215  
216  
217  
218  
219  
220  
221  
222  
223  
224  
225  
226  
227  
228  
229  
230  
231  
232  
233  
234  
235  
236  
237  
238  
239  
240  
241  
242  
243  
244  
245  
246  
247  
248  
249  
250  
251  
252  
253  
254  
255  
256  
257  
258  
259  
260  
261  
262  
263  
264  
265  
266  
267  
268  
269  
270  
271  
272  
273  
274  
275  
276  
277  
278  
279  
280  
281  
282  
283  
284  
285  
286  
287  
288  
289  
290  
291  
292  
293  
294  
295  
296  
297  
298  
299  
300  
301  
302  
303  
304  
305  
306  
307  
308  
309  
310  
311  
312  
313  
314  
315  
316  
317  
318  
319  
320  
321  
322  
323  
324  
325  
326  
327  
328  
329  
330  
331  
332  
333  
334  
335  
336  
337  
338  
339  
340  
341  
342  
343  
344  
345  
346  
347  
348  
349  
350  
351  
352  
353  
354  
355  
356  
357  
358  
359  
360  
361  
362  
363  
364  
365  
366  
367  
368  
369  
370  
371  
372  
373  
374  
375  
376  
377  
378  
379  
380  
381  
382  
383  
384  
385  
386  
387  
388  
389  
390  
391  
392  
393  
394  
395  
396  
397  
398  
399  
400  
401  
402  
403  
404  
405  
406  
407  
408  
409  
410  
411  
412  
413  
414  
415  
416  
417  
418  
419  
420  
421  
422  
423  
424  
425  
426  
427  
428  
429  
430  
431  
432  
433  
434  
435  
436  
437  
438  
439  
440  
441  
442  
443  
444  
445  
446  
447  
448  
449  
450  
451  
452  
453  
454  
455  
456  
457  
458  
459  
460  
461  
462  
463  
464  
465  
466  
467  
468  
469  
470  
471  
472  
473  
474  
475  
476  
477  
478  
479  
480  
481  
482  
483  
484  
485  
486  
487  
488  
489  
490  
491  
492  
493  
494  
495  
496  
497  
498  
499  
500  
501  
502  
503  
504  
505  
506  
507  
508  
509  
510  
511  
512  
513  
514  
515  
516  
517  
518  
519  
520  
521  
522  
523  
524  
525  
526  
527  
528  
529  
530  
531  
532  
533  
534  
535  
536  
537  
538  
539  
540  
541  
542  
543  
544  
545  
546  
547  
548  
549  
550  
551  
552  
553  
554  
555  
556  
557  
558  
559  
560  
561  
562  
563  
564  
565  
566  
567  
568  
569  
570  
571  
572  
573  
574  
575  
576  
577  
578  
579  
580  
581  
582  
583  
584  
585  
586  
587  
588  
589  
590  
591  
592  
593  
594  
595  
596  
597  
598  
599  
600  
601  
602  
603  
604  
605  
606  
607  
608  
609  
610  
611  
612  
613  
614  
615  
616  
617  
618  
619  
620  
621  
622  
623  
624  
625  
626  
627  
628  
629  
630  
631  
632  
633  
634  
635  
636  
637  
638  
639  
640  
641  
642  
643  
644  
645  
646  
647  
648  
649  
650  
651  
652  
653  
654  
655  
656  
657  
658  
659  
660  
661  
662  
663  
664  
665  
666  
667  
668  
669  
670  
671  
672  
673  
674  
675  
676  
677  
678  
679  
680  
681  
682  
683  
684  
685  
686  
687  
688  
689  
690  
691  
692  
693  
694  
695  
696  
697  
698  
699  
700  
701  
702  
703  
704  
705  
706  
707  
708  
709  
710  
711  
712  
713  
714  
715  
716  
717  
718  
719  
720  
721  
722  
723  
724  
725  
726  
727  
728  
729  
730  
731  
732  
733  
734  
735  
736  
737  
738  
739  
740  
741  
742  
743  
744  
745  
746  
747  
748  
749  
750  
751  
752  
753  
754  
755  
756  
757  
758  
759  
760  
761  
762  
763  
764  
765  
766  
767  
768  
769  
770  
771  
772  
773  
774  
775  
776  
777  
778  
779  
780  
781  
782  
783  
784  
785  
786  
787  
788  
789  
790  
791  
792  
793  
794  
795  
796  
797  
798  
799  
800  
801  
802  
803  
804  
805  
806  
807  
808  
809  
810  
811  
812  
813  
814  
815  
816  
817  
818  
819  
820  
821  
822  
823  
824  
825  
826  
827  
828  
829  
830  
831  
832  
833  
834  
835  
836  
837  
838  
839  
840  
841  
842  
843  
844  
845  
846  
847  
848  
849  
850  
851  
852  
853  
854  
855  
856  
857  
858  
859  
860  
861  
862  
863  
864  
865  
866  
867  
868  
869  
870  
871  
872  
873  
874  
875  
876  
877  
878  
879  
880  
881  
882  
883  
884  
885  
886  
887  
888  
889  
890  
891  
892  
893  
894  
895  
896  
897  
898  
899  
900  
901  
902  
903  
904  
905  
906  
907  
908  
909  
910  
911  
912  
913  
914  
915  
916  
917  
918  
919  
920  
921  
922  
923  
924  
925  
926  
927  
928  
929  
930  
931  
932  
933  
934  
935  
936  
937  
938  
939  
940  
941  
942  
943  
944  
945  
946  
947  
948  
949  
950  
951  
952  
953  
954  
955  
956  
957  
958  
959  
960  
961  
962  
963  
964  
965  
966  
967  
968  
969  
970  
971  
972  
973  
974  
975  
976  
977  
978  
979  
980  
981  
982  
983  
984  
985  
986  
987  
988  
989  
990  
991  
992  
993  
994  
995  
996  
997  
998  
999  
1000

54 **METHODS AND ANALYSIS:** The CLUBMEDS study will include a formative (pre-  
55 implementation) qualitative evaluation, a pilot study and a process (post-implementation)  
56 qualitative evaluation. At the formative stages, focus group discussions with patient groups and  
57 in-depth interviews with healthcare providers, managers and key decision makers will be  
58 conducted to understand the feasibility, barriers and facilitators, opportunities and challenges  
59 for the successful implementation of the CLUBMEDS strategy. The CLUBMEDS pilot study  
60 will be implemented in two primary healthcare facilities, one urban and one rural, in Southeast  
61 Nigeria. Each adherence club, which consists of a group of 10-15 patients with hypertension  
62 under the leadership of a role-model patient, serves as a support group to encourage and  
63 facilitate adherence, BP self-monitoring and medication delivery on a monthly basis. A process  
64 evaluation will be conducted at the end of the pilot study to evaluate the acceptability and  
65 engagement with the CLUBMEDS strategy. To date, 103 patients were recruited and grouped  
66 into 9 clubs, in which patients will be followed-up for six months.

67 **ETHICS AND DISSEMINATION:** The study was approved by the University of Abuja  
68 Teaching Hospital and the Federal Teaching Hospital Abakaliki Human Research Ethics  
69 Committees and all patients provided informed consent. Our findings will provide preliminary

1  
2  
3 70 data on the potential effectiveness and acceptance of this strategy in a hypertension context.  
4  
5  
6 71 Study findings will be disseminated via scientific forums.  
7  
8  
9 72  
10  
11  
12 73 **ABSTRACT WORD COUNT: 299 (max. 300)**  
13  
14  
15 74  
16  
17  
18 75 **KEYWORDS:** Medication adherence, peer-support groups, adherence clubs, hypertension,  
19  
20 76 anti-hypertensives  
21  
22  
23  
24 77  
25  
26  
27 78  
28  
29  
30 79  
31  
32  
33 80  
34  
35  
36 81  
37  
38  
39 82  
40  
41  
42 83  
43  
44  
45 84  
46  
47  
48 85  
49  
50  
51 86  
52  
53  
54  
55 87  
56  
57  
58 88  
59  
60

## 89 STRENGTHS AND LIMITATIONS OF THIS STUDY

- 90 • Hypertension prevalence in sub-Saharan Africa (SSA) is among the world's highest;  
91 however, access to anti-hypertensive treatment is limited by significant health system,  
92 geographical and financial barriers.
- 93 • Alternative models of care using community peer-support groups are a promising  
94 strategy to overcome these barriers to hypertension control and reach those patients  
95 who are not captured in regular healthcare settings.
- 96 • Adherence clubs, which consists of groups of 10-15 patients with hypertension under  
97 the leadership of a role-model patient, might be a promising strategy, serving as a  
98 support group to encourage and facilitate adherence, blood pressure self-monitoring  
99 and medication delivery.
- 100 • The CLUBMEDS study, which will include a formative (pre-implementation)  
101 qualitative evaluation, a pilot study and a process (post-implementation) qualitative  
102 evaluation, aims to evaluate the feasibility and impact of adherence clubs to improve  
103 hypertension control in Nigeria.
- 104 • This study is a pilot study and, therefore, it is limited by its small sample size and short-  
105 term follow-up; however, the study findings will provide preliminary data on the  
106 potential effectiveness and acceptance of this strategy in a hypertension context.

107

## 108 INTRODUCTION

### 109 The Burden of Hypertension in Sub-Saharan Africa and Nigeria

110 Hypertension is the second leading risk factor for lost disability-adjusted life-years (DALYs)  
111 in men and the leading risk factor in women globally.[1] Despite the global effort to mitigate  
112 the impact of hypertension worldwide, it remains a major public health threat, accounting for  
113 10.5 million deaths in 2016.[1] A recent meta-analysis estimated the prevalence of  
114 hypertension to be 28.5% in high-income countries (HICs) and 31.5% in low and middle-  
115 income countries (LMICs), accounting for 349 million and 1.04 billion people living with  
116 hypertension, respectively, in 2010.[2] Proportions of awareness, treatment and control of  
117 hypertension are lower in LMICs when compared to HICs. In 2010, the estimated awareness,  
118 treatment and control rates for hypertension were 37.9%, 29.0% and 7.7%, respectively, in  
119 LMICs; while in HICs they were estimated to be 67.0%, 55.6% and 28.4%, respectively.[2]

120

121 The prevalence of hypertension in sub-Saharan Africa (SSA) is among the world's highest,  
122 having been reported to vary between 15% and 70% among SSA countries, with an average of  
123 30%.[3] SSA had the highest prevalence of hypertension in women in 2010.[2] Approximately  
124 128.6 million people in SSA were living with hypertension in 2010, having increased from  
125 50.4 million in 2000.[2] This steady increase has been attributed mainly due to increased life  
126 expectancy, urbanisation and globalization, and consequent changes in lifestyle behaviours,  
127 such as smoking, reduced physical activity, and unhealthy diet.[4] Furthermore, the impact of  
128 hypertension is worse in SSA countries. It is known that mortality and morbidity rates  
129 associated with hypertension and its complications, such as ischaemic heart disease, stroke and  
130 heart failure, are higher in SSA when compared to other regions of the world.[5] These  
131 complications are worsened by the low rates of hypertension awareness and treatment in SSA.



1  
2  
3 132 Rates of awareness (27%), treatment (18%) and control (7%) of hypertension in SSA are some  
4  
5 133 of the lowest in the world.[3] In addition, many SSA countries struggle to appropriately tackle  
6  
7 134 hypertension, as they face a double burden of communicable and chronic diseases, and often  
8  
9 135 healthcare spending on communicable diseases is prioritised, resulting in hypertension-related  
10  
11 136 healthcare spending not being enough to cover the costs of basic diagnostic equipment, health  
12  
13 137 workers training and treatment supplies.[4, 5].  
14  
15  
16  
17  
18 138

19  
20  
21 139 Nigeria is the most populous country in Africa with an estimated population of 193 million in  
22  
23 140 2016.[6] Like other SSA countries, the prevalence of hypertension in Nigeria is high. A recent  
24  
25 141 review found that the pooled prevalence of hypertension in Nigeria was 22.5%, varying  
26  
27 142 between 8.0% and 46.4%, depending on the target population, type of measurement and  
28  
29 143 hypertension definition.[7] In Nigeria, hypertension awareness (14.2% to 30%), treatment  
30  
31 144 (18.6 to 21.0%) and control (5.0% to 17.5%) are similar to other SSA countries.[7]  
32  
33 145 Hypertension has also been associated with high rates of stroke, ischaemic heart disease, heart  
34  
35 146 failure and chronic kidney disease in Nigeria[7]. Therefore, hypertension is a major public  
36  
37 147 health challenge in this country.  
38  
39  
40  
41  
42  
43  
44

#### 45 149 **Barriers to Blood Pressure Control**

46  
47  
48 150 There are three major categories of barriers to control of hypertension: 1) patient-related, 2)  
49  
50 151 provider-related, and 3) healthcare system-related.[8, 9] Patient-related barriers are well-  
51  
52 152 known and include low health literacy, beliefs and attitudes about hypertension and its  
53  
54 153 treatment;[8, 9] depression, anxiety and stress;[8, 10] lack of motivation and social support;[8]  
55  
56 154 and medication side effects and costs.[9] Some of the provider-related barriers include lack of  
57  
58  
59  
60

1  
2  
3 155 knowledge about treatment guidelines, lack of trust in clinical guidelines, clinical inertia on  
4  
5 156 initiating or up-titrating the treatment, and communication issues, such as lack of  
6  
7 157 encouragement for medication adherence and blood pressure (BP) control.[8, 9] In addition,  
8  
9 158 there are other barriers at the level of healthcare systems, which include long distance to the  
10  
11 159 healthcare facility, long waiting time for consultations, insufficient diagnostic equipment,  
12  
13 160 inadequate numbers of health workers trained to manage patients with hypertension, and  
14  
15 161 inadequate or absent health insurance coverage in many LMICs.[5]  
16  
17  
18  
19  
20  
21  
22

23 163 In Nigeria, a 2014 study evaluated patient-related barriers to control of hypertension and found  
24  
25 164 a few key factors that could explain poor hypertension control. This study found a poor  
26  
27 165 knowledge of consequences of inadequate BP control, forgetfulness in taking BP medications  
28  
29 166 and non-affordability of medications.[11] Another study from Nigeria reported that the main  
30  
31 167 barriers to medication adherence and BP control included healthcare system-related barriers,  
32  
33 168 such as inconvenient clinic operating hours, long waiting times and under-dispensing of  
34  
35 169 prescribed medications, when due to the lack of availability of anti-hypertensive medications  
36  
37 170 the pharmacists dispense a smaller quantity of pills than needed by the patients.[12] Patient-  
38  
39 171 related barriers were also reported, such as the lack of knowledge that regular medication use  
40  
41 172 is needed and interruption of the anti-hypertensive treatment due to side effects or  
42  
43 173 cultural/faith-motivated reasons.[12] Moreover, some of the above-mentioned barriers often  
44  
45 174 interfere with the patients' daily life, for example, due to inconvenient clinic operating hours,  
46  
47 175 long distances and long waiting times, the patients usually need to take a day off from work to  
48  
49 176 attend the clinic. The consequence of missing a day of work might be that patients would have  
50  
51 177 less money to purchase the anti-hypertensive medications. To overcome some of these barriers,  
52  
53 178 alternative models of care, in which there is a shift of the provision of care and treatment from  
54  
55 179 the healthcare facilities to the community are needed.  
56  
57  
58  
59  
60

180

**181 Community-Based Models of Care**

182 The term communitisation of healthcare has been previously used to describe the shift in how  
183 healthcare is delivered, where the patients, the communities and the healthcare system share  
184 the responsibility for finding solutions to healthcare problems and challenges.[13] Peer support  
185 groups are an example of this concept of communitisation of care. Peer support groups consist  
186 of groups of patients with the same health condition, in which the patients support each other  
187 and share the challenges, and often the solutions, of living with that specific chronic health  
188 condition. Previous studies have shown that peer support groups improve patient experience,  
189 adherence, health outcomes and service use among patients with different health conditions,  
190 mainly mental illness and HIV/AIDS.[13]

191

192 In the HIV/AIDS context, different types of peer support groups have been studied and shown  
193 to be effective. One of these types of peer support groups are the so-called adherence clubs. In  
194 these adherence clubs, lay counsellors, who act as the club facilitators, dispense medication to  
195 stable patients in a community setting.[14-16] The lay counsellors also measure weight,  
196 conduct symptom-based general assessments and provide peer support to encourage  
197 medication adherence.[17] A few studies in patients with HIV/AIDS in South Africa have  
198 shown that this club-based strategy improved adherence, reduced virological rebound and  
199 improved retention in care. [15, 18-20]

200

201 The adherence clubs were proven effective in the HIV/AIDS setting and it has the potential to  
202 be translated to other chronic diseases, such as hypertension. However, to date, this club-based

1  
2  
3 203 strategy has not been evaluated for other chronic disease conditions. Therefore, the  
4  
5 204 CLUBMEDS study aims to evaluate a community club-based strategy to deliver anti-  
6  
7  
8 205 hypertensive medication to patients with hypertension in Southeast Nigeria.  
9  
10

11 206

## 14 207 **METHODS AND ANALYSIS**

### 17 208 **The CLUBMEDS Study**

19  
20 209 The CLUBMEDS study aims to evaluate the feasibility and impact of adherence clubs to  
21  
22 210 improve hypertension control in Nigeria. For a community-based model/strategy to work, it is  
23  
24 211 essential to involve the patients, their relatives and the whole community in the planning and  
25  
26 212 implementation of such strategy. Before implementing any community-based strategy, it is  
27  
28 213 important to understand patients' preferences, the barriers and facilitators from various  
29  
30 214 stakeholders' perspectives, including patients, healthcare providers and the health system  
31  
32 215 managers. Therefore, this feasibility evaluation will provide valuable insights for future  
33  
34 216 implementation of a community club-based medication delivery strategy in a larger scale and  
35  
36 217 will guide important adaptations to the model depending on the context it is being implemented.  
37  
38  
39  
40  
41  
42 218

43  
44  
45 219 The CLUBMEDS study will include a formative (pre-implementation) qualitative evaluation,  
46  
47 220 a pilot study and a process (post-implementation) qualitative evaluation.  
48  
49

50 221

### 53 222 **Patient and Public involvement statement**

54  
55  
56 223 It is important to acknowledge that patients will be involved in the development of this study.  
57  
58  
59  
60 224

### 225 **Formative qualitative evaluation**

226 As part of the CLUBMEDS study, a qualitative evaluation will be done at the formative stage  
227 of the strategy. Focus group discussions with patient groups and in-depth interviews with  
228 healthcare providers, managers and key decision makers will be conducted to understand the  
229 feasibility, barriers and facilitators, opportunities and challenges for the successful  
230 implementation of the CLUBMEDS strategy. This qualitative evaluation will also help build  
231 ownership of the CLUBMEDS strategy among the stakeholders. We will explore three main  
232 conceptual areas; 1) current understanding of hypertension and the health risks associated with  
233 it, 2) the challenges faced in accessing and adhering to medications by those who are using  
234 anti-hypertensive medications, and 3) the perceived value and acceptability of future  
235 implementation of the CLUBMEDS strategy.

### 237 **The CLUBMEDS pilot study**

238 The CLUBMEDS pilot study will be implemented in two primary healthcare facilities, one  
239 urban and one rural, in Southeast Nigeria. The urban site is located at Abakaliki, the capital  
240 city of Ebonyi State. According to the 2006 census, the population in Abakaliki city was  
241 79,280, while in the Abakaliki Local Government Area was 149,683.[21, 22] To date, there is  
242 no published data on the prevalence of hypertension in Abakaliki, however, a study in a nearby  
243 urban city of Enugu with similar population characteristics reported an overall prevalence of  
244 hypertension of 42%. The rural site is located at Awkuzu, a town in Oyi Local Government  
245 Area of Anambra State. According to the 2006 census, population of Oyi Local Government  
246 Area was 168,201, [23] however there is no published data on the Awkuzu's population.  
247 According to the unpublished report of the Removing the Mask on Hypertension (REMAH)  
248 project, prevalence, treatment and control of hypertension in Awkuzu is 18.61%, 8.23% and  
249 1.98%, respectively.

1  
2  
3 250

4  
5 251 The structure of the CLUBMEDS pilot study will mimic the structure used in the HIV/AIDS  
6 adherence clubs. The CLUBMEDS adherence clubs will consist of one role-model patient, who  
7  
8 252 will act as the club facilitator, and between 10 to 15 patients with hypertension, who will be  
9  
10 253 called club members. The adherence clubs will meet on a monthly basis for six months.  
11  
12 254 Between three to five adherence clubs will be formed in each primary healthcare facility,  
13  
14 255 aiming to recruit a total of at least 100 patients (Figure 1). In each primary healthcare facility,  
15  
16 256 community health extension workers (CHEWs) and nurses will be the point of contact for any  
17  
18 257 clinical support to the adherence clubs.  
19  
20 258  
21  
22 259

## 23 24 25 26 260 Recruitment and training

27  
28 261 Research assistants working on the CLUBMEDS study in each primary healthcare facility will  
29  
30 262 recruit patients with hypertension to participate in the CLUBMEDS strategy. All patients will  
31  
32 263 be required to provide informed consent to participate in the study. After obtaining informed  
33  
34 264 consent, the research assistant will perform a baseline assessment, in which information on  
35  
36 265 demographics, hypertension history, comorbidities, lifestyle risk factors, anti-hypertensive  
37  
38 266 medications being taken, and medication adherence will be collected. In addition, BP  
39  
40 267 measurements will be performed using an automated BP monitor. The research assistants will  
41  
42 268 then identify and select patients that are eligible to be the role-mode patients. To be eligible to  
43  
44 269 be a role-model patient, the selected patients will have to meet the following criteria:

- 45  
46  
47 270 1) Be considered adherent to the anti-hypertensive treatment, if they:
- 48  
49 271 • have collected the anti-hypertensive medication every month in the last six
  - 50  
51 272 months, and
  - 52  
53 273 • have attended the primary healthcare facility at least twice in the last six months;
- 54  
55 274 2) Have at least secondary school completion;
- 56  
57  
58  
59  
60

1  
2  
3 275 3) Agree to take the responsibility of acting as the club facilitator.  
4  
5  
6 276

7  
8 277 After identifying and selecting the role-model patients, the research assistants will provide  
9  
10 278 training on BP monitoring, management of hypertension and how the CLUBMEDS strategy  
11  
12 279 will work to both the role-model patients and the facility CHEWs. CHEWs will participate in  
13  
14 280 a 3-day training program, while role-model patients will receive a simplified and tailored 1-  
15  
16  
17 281 day training program. The training will include:

- 18  
19 282
- 20 • Basic information on hypertension:
    - 21 283 ▪ Epidemiology, causes, related risk factors, diagnosis and management of
    - 22 284 hypertension;
    - 23  
24 285 ▪ Information on non-pharmacologic management of hypertension;
    - 25  
26 286 ▪ Information on the importance of adherence to anti-hypertensive medications;
    - 27  
28 287 ▪ Information on the importance of regular BP checks.
    - 29  
30  
31 288
  - 32 • Training on:
    - 33 289 ▪ How to measure BP appropriately with an automated BP monitor;
    - 34  
35 290 ▪ How to identify alert signs, e.g. uncontrolled and complications of high BP;
    - 36  
37 291 ▪ Management of the adherence clubs, including how to register the patients,
    - 38  
39 292 record data in the register and distribute the medications to the patients (only to
    - 40  
41 293 role-model patients).
    - 42  
43  
44  
45  
46  
47 294

48  
49 295 Finally, the research assistants will help the patients to form the CLUBMEDS adherence clubs  
50  
51 296 by assigning one role-model patient and around 10 to 15 patients with hypertension, the club  
52  
53 297 members, to an adherence club based on their domiciliary proximity. Once the adherence clubs  
54  
55 298 are formed, the patients take responsibility on the overall running of the clubs.  
56  
57  
58 299

1  
2  
3 300 CLUBMEDS monthly sessions  
4  
5

6 301 The CLUBMEDS adherence clubs will meet on a monthly basis in a local community centre.  
7

8 302 The role-model patient and the club members will decide which day and time the clubs will  
9

10  
11 303 meet on a regular basis, e.g. every last Sunday of the month at 6:00pm.  
12  
13

14 304  
15  
16

17 305 The role-model patients will act as the club facilitators, being responsible for preparing and  
18

19 306 running the club sessions, including the following tasks:  
20  
21

22 307 • Preparing for the club session, including ensuring that the anti-hypertensive medication  
23

24 308 refills are ordered from the pharmacist at the healthcare facility and ready for pick-up  
25

26 309 before the club session;  
27  
28

29 310 • Registering club members by writing the club members' names in the CLUBMEDS  
30

31 311 monthly session register when they arrive to the club session;  
32  
33

34 312 • Measuring the club members' BP using an automated BP monitor;  
35  
36

37 313 • Delivering the anti-hypertensive medications to each club member;  
38  
39

40 314 • Recording information in the CLUBMEDS monthly session register, including: the BP  
41

42 315 measurements, the quantity of pills returned by the club members, if any, and the  
43

44 316 quantity of pills provided to each club member in the current club session;  
45  
46

47 317 • Supporting/educating the club members about adherence;  
48  
49

50 318 • Identifying any symptoms and alert signs in the club members;  
51  
52

53 319 • Referring club members back to the primary healthcare facility to be evaluated by a  
54

55 320 CHEW or nurse, if symptom/alert signs are present or, if the club member is due to a  
56

57 321 regular 6 months check-up at the facility;  
58  
59

60 322 • After the club session, returning any uncollected medications to the pharmacy and  
61

62 323 following-up with club members who missed the club session.  
63



324

325 The facility CHEWs and nurses will be the point of contact for the role-model patients and club  
326 members in the primary healthcare facilities to support to the overall conduct of the adherence  
327 clubs; however, they will not be present in the CLUBMEDS monthly sessions. The facility  
328 CHEWs and nurses will be still responsible for the clinical management of the patients  
329 participating in the CLUBMEDS study by:

- 330 • Ensuring the six-monthly scripting of club members;
- 331 • Scheduling regular return visits to the facility for club members every six months;
- 332 • Up-titrating or changing the anti-hypertensive medications;
- 333 • Evaluating club members with symptoms/alert signs who are referred to the facility by  
334 the role-model patients;
- 335 • Supporting the role-model patients in any club-related issues, if necessary.

336

337 The pharmacist or pharmacist assistant at the facility will be responsible for pre-packing the  
338 anti-hypertensive medication refills for the adherence clubs to be collected by the role model  
339 patients before every CLUBMEDS monthly session. There will be no regular physician  
340 involvement in the CLUBMEDS strategy due to shortages of physicians working in the primary  
341 healthcare facilities involved in the study. In these facilities, non-physicians (CHEWs and  
342 nurses) are the ones responsible for seeing and handling the patients' health issues.

343

344 CLUBMEDS outcomes

345 The CLUBMEDS strategy will be tested for six months and the outcome variables to be  
346 evaluated during this pilot study are presented in Box 1. At six months, the role-model patients

1  
2  
3 347 and club members will be re-assessed by the CLUBMEDS research assistants. Data on  
4  
5 348 medication adherence, BP, hospitalisations due to cardiovascular clinical events and the anti-  
6  
7 349 hypertensive medications being taken by the participants will be collected by the research  
8  
9 350 assistants. Medication adherence will be assessed using a visual analogue scale, information  
10  
11 351 on the number of pills missed in the last seven days and pill count. Three BP measurements  
12  
13 352 will be conducted using an automated BP monitor (Omron model 705IT). The first BP  
14  
15 353 measurement will be discarded and the mean value of the last two measurements will be  
16  
17 354 calculated. Data on the club attendance, BP measurements and medication adherence collected  
18  
19 355 during the club sessions will be also evaluated.  
20  
21  
22  
23  
24 356

25  
26  
27 **Box 1: CLUBMEDS primary and secondary outcomes**

28  
29 **Primary**

- 30  
31  
32 • Medication adherence – Visual analog scale  
33

34  
35 **Secondary**

- 36  
37  
38 • Medication adherence – Number of pills missed in the last 7 days and pill count  
39  
40 • Blood pressure – Resting, sitting automated digital recording, mean of last two readings  
41  
42 • Hospital admissions due to cardiovascular clinical events – Self-report  
43  
44 • Attendance to club sessions – CLUBMEDS monthly session register  
45  
46  
47 • Acceptability and engagement with the CLUBMEDS strategy (As part of the process  
48  
49 qualitative evaluation)  
50

51  
52 357

53  
54 358

55  
56 359 **Process qualitative evaluation**  
57  
58  
59  
60

1  
2  
3 360 A process evaluation will be conducted at the end of the pilot study (post-implementation stage)  
4  
5 361 to evaluate the acceptability and engagement with the CLUBMEDS strategy. Focus group  
6  
7 362 discussions with club members and in-depth interviews with the role-model patients, CHEWs,  
8  
9 363 nurses, pharmacists, and any other healthcare providers involved in the CLUBMEDS study  
10  
11 364 will be conducted to understand the strengths and weaknesses of the strategy, what worked and  
12  
13 365 what did not work, how can the strategy be adapted and improved according to any challenges  
14  
15 366 identified in this pilot study that might preclude the future successful implementation of the  
16  
17 367 CLUBMEDS strategy.  
18  
19  
20  
21  
22  
23

### 24 369 **CLUBMEDS Progress to Date**

25  
26 370 The recruitment to the CLUBMEDS strategy started in March 2018. Two focus groups (18  
27  
28 371 male and 20 female participants) and five in-depth interviews were successfully conducted,  
29  
30 372 and more are being planned in both the urban and rural sites as part of the formative qualitative  
31  
32 373 evaluation. This qualitative data is currently being analysed and the findings will be published  
33  
34 374 in a separate paper.  
35  
36  
37  
38  
39  
40

41 376 To date, 104 patients were recruited to participate in the CLUBMEDS pilot study, being 82 in  
42  
43 377 the urban site and 22 in the rural site. Nine role-model patients were identified, selected and  
44  
45 378 trained to run the adherence clubs in both sites. Seven adherence clubs were formed in the  
46  
47 379 urban site with between 10 and 13 club members in each club, while two adherence clubs were  
48  
49 380 formed in the rural site with 10 and 13 club members in each club. At the baseline assessment,  
50  
51 381 the recruited CLUBMEDS participants had a mean age of 56.8 years (SD 10.7), 73 (70%) were  
52  
53 382 women, and a mean BP of 146.7/86.9 mmHg (SD 20.1/11.2). The majority of participants  
54  
55 383 reported taking only one (49.0%) or two (47.1%) anti-hypertensive medications at the baseline  
56  
57 384 assessment, while only 3.8% reported taking three classes of anti-hypertensive medications.  
58  
59  
60

1  
2  
3 385 The median medication adherence percentage of anti-hypertensive medications taken by the  
4  
5 386 participants in the past month was 44.5% (IQR 30) measured by the visual analogue scale. The  
6  
7 387 CLUBMEDS monthly sessions are currently being held successfully.  
8  
9

10 388

11  
12 389

## 13 14 390 **ETHICS AND DISSEMINATION**

15  
16  
17 391 The findings of this study will be disseminated via scientific forums including peer-reviewed  
18  
19 392 publications and presentations at international and national conferences. The study design and  
20  
21 393 conduct is being overseen by a steering committee (authors), a group of Emerging Leaders  
22  
23 394 from the World Heart Federation. This committee has expertise in large-scale clinical trials,  
24  
25 395 qualitative research and clinical CVD management. This study will adhere to the Declaration  
26  
27 396 of Helsinki, a statement of ethical principles for medical research involving human subjects.  
28  
29 397 The study was approved by the University of Abuja Teaching Hospital and the Federal  
30  
31 398 Teaching Hospital Abakaliki Human Research Ethics Committees and all patients provided  
32  
33 399 informed consent.  
34  
35  
36  
37  
38

39 400

## 40 401 **DISCUSSION**

41  
42 402 Hypertension is a major public health issue worldwide and even more so in LMICs, such as  
43  
44 403 Nigeria. The current healthcare facility-based model of care has failed to provide appropriate  
45  
46 404 care to ensure adequate BP control in patients with hypertension. Alternative models of care  
47  
48 405 based on shared responsibility between patients, communities and the healthcare system might  
49  
50 406 be the way forward. The CLUBMEDS study is one of the first studies evaluating a community  
51  
52 407 club-based strategy to deliver anti-hypertensive medication to patients with hypertension in  
53  
54 408 Nigeria, adapting a strategy that was shown to be effective in HIV/AIDS to the hypertension  
55  
56 409 context.  
57  
58  
59  
60

1  
2  
3 410  
4  
5

6 411 In the HIV/AIDS context, a variety of innovative strategies to increase community engagement  
7  
8 412 in the care and anti-retroviral therapy (ART) delivery have been piloted and studied in southern  
9  
10 413 Africa in the last decade.[14, 16, 24, 25] Community-based models of ART delivery aims to  
11  
12 414 improve retention in care, by separating drug delivery from clinical visits. From the patient  
13  
14 415 perspective, the main advantages of these strategies are the reduction of travel costs and time  
15  
16 416 spent in frequent clinic visits, and peer support encouragement at the community level.[14, 16]  
17  
18 417 From the healthcare system's perspective, the major advantages are the reduction of staff  
19  
20 418 workload, keeping the clinical staff focussed on clinical problems, and the encouragement of  
21  
22 419 patient autonomy.[14, 16] One of these strategies that has been previously implemented and  
23  
24 420 evaluated is the community-based ART adherence clubs, including facility-based and  
25  
26 421 community-based adherence clubs.[14, 16]  
27  
28  
29  
30  
31

32 422  
33  
34

35 423 Similar to the CLUBMEDS strategy, in the ART adherence club community-based medication  
36  
37 424 delivery strategy, lay counsellors dispensed the medications to stable patients in a community  
38  
39 425 setting, either in patients' home or at community venues.[14-16] The lay counsellors, who  
40  
41 426 acted as the club facilitators, were also responsible for measuring the patients' weight,  
42  
43 427 conducting symptom-based general assessments and providing peer support to encourage  
44  
45 428 medication adherence.[17] These ART adherence clubs, which had between 15-30 patients,  
46  
47 429 met regularly and were supported by a facility nurse.[17]  
48  
49  
50

51  
52 430  
53  
54

55 431 An evaluation of the club-based strategy for HIV/AIDS in South Africa showed that, less than  
56  
57 432 0.1% (9/2133) patients died and 0.3% (53/2133) were referred back to the facility due to  
58  
59  
60

1  
2  
3 433 clinical complications over 18 months.[18] In another study in South Africa, 12% more patients  
4  
5 434 remained in care and were 67% less likely to experience virological rebound in the club-based  
6  
7  
8 435 strategy compared to clinic-based care.[15, 26] This club-based strategy has also been shown  
9  
10 436 to reduce costs and have fewer barriers to ongoing access to care, including shorter waiting  
11  
12 437 times, higher acceptability of services and fewer missed clinic appointments.[27]  
13  
14

15 438

17  
18 439 An important finding from these studies was that for the club-based strategy to be successful it  
19  
20 440 was essential that the medications, in this case the ART, were pre-packaged and labelled for  
21  
22 441 each patient at the facility, and that the club facilitator collected and transported the packs to  
23  
24 442 the meeting venue. Also, it was important that patients reporting any symptoms or adverse  
25  
26 443 effects, such as weight loss in the HIV/AIDS context, were referred back to the facility to be  
27  
28 444 assessed by a nurse, and that all club participants saw a facility nurse at least once a year for  
29  
30 445 their regular clinical check-up.  
31  
32  
33

34 446

35  
36  
37  
38 447 If also shown to be effective and acceptable to the patients and other stakeholders, the  
39  
40 448 CLUBMEDS strategy has the potential to change the current hypertension scenario, especially  
41  
42 449 in resource-limited settings like many SSA countries, including Nigeria. The CLUBMEDS  
43  
44 450 strategy has the potential of delivering a better care to patients with hypertension, by involving  
45  
46 451 them, their relatives and their communities in their healthcare. With this engagement, we aim  
47  
48 452 to improve the patients' knowledge about hypertension, encourage medication adherence and  
49  
50 453 facilitate medication delivering, bringing the medications closer to the patients.  
51  
52  
53

54 454

55  
56  
57  
58 455 **CONCLUSION**  
59  
60

1  
2  
3 456 With the growing burden of hypertension in Nigeria and other LMICs, a change in the current  
4  
5 457 model of hypertension management and treatment from the healthcare facility to community,  
6  
7 458 is imperative. If we are to achieve the ‘25 x 25’ World Heart Federation and World Health  
8  
9 459 Organisation target of reducing premature cardiovascular disease mortality by 25% by 2025  
10  
11 460 worldwide, we need to accelerate our efforts in bringing anti-hypertensive treatment closer to  
12  
13 461 the population and ensure that at least 50% of eligible people are receiving medications to  
14  
15 462 prevent heart attacks and strokes. A club-based strategy, which was shown to be effective and  
16  
17 463 acceptable in the HIV/AIDS context, can similarly improve provision of care and treatment to  
18  
19 464 hypertensive patients in resource-limited areas in LMICs. The CLUBMEDS study aims to  
20  
21 465 evaluate a similar club-based strategy in patients with hypertension in Nigeria, where  
22  
23 466 hypertension awareness, treatment and control remains suboptimal. The CLUBMEDS pilot  
24  
25 467 study together with the formative and process qualitative evaluations will provide important  
26  
27 468 preliminary data on the potential implementation of this approach in the hypertension context.  
28  
29 469 If this strategy is shown to be feasible and acceptable, future studies may test the effectiveness  
30  
31 470 of this strategy to improve BP control and longer-term medication adherence in LMICs, such  
32  
33 471 as Nigeria. The CLUBMEDS findings will add to the body of evidence supporting adherence  
34  
35 472 clubs as a way to overcome barriers to optimal treatment adherence.  
36  
37  
38  
39  
40  
41  
42  
43  
44  
45

473

## 474 **DECLARATIONS**

### 475 **Statement**

476 The Corresponding Author has the right to grant on behalf of all authors and does grant on  
477 behalf of all authors, an exclusive licence on a worldwide basis to the BMJ Publishing Group  
478 Ltd and its Licensees to permit this article (if accepted) to be published in BMJ Open editions  
479 and any other BMJ PGL products to exploit all subsidiary rights.

1  
2  
3 480  
4  
56 481 **Ethics approval**  
7  
8

9 482 The study was approved by the University of Abuja Teaching Hospital and the Federal  
10 483 Teaching Hospital Abakaliki Human Research Ethics Committees and all patients provided  
11  
12 484 informed consent.  
13  
14  
15  
16

17 485  
18  
1920 486 **Competing interests**  
21

22 487 The authors declare no potential conflicts of interest with respect to the research, authorship  
23 and/or publication of this article.  
24  
25  
26  
27

28 489  
2930 490 **Funding**  
31

32 491 The CLUBMEDS study is supported by a World Heart Federation Emerging Leaders  
33 Programme pilot funding grant.  
34  
35  
36  
37  
38

39 493  
40  
4142 494 **Authors' contributors**  
43  
44

45 495 All authors conceived and developed this research as a collaborative group during a one-week  
46 international seminar and subsequent meetings through the World Heart Federation Emerging  
47 496 Leaders Programme. GI, SBF, CU and AO are leading the project locally in Nigeria. KS drafted  
48 the manuscript. All authors critically revised the manuscript, have read and approved the final  
49 497 manuscript.  
50  
51  
52  
53  
54  
55  
56

57 500  
58  
59  
60



1  
2  
3 501 **Acknowledgments**  
4  
5

6 502 The authors thank World Heart Federation Emerging Leaders Programme and Committee who  
7  
8  
9 503 supported and peer-reviewed the content of this research. In particular, the authors thank Mark  
10  
11 504 Huffman, Pablo Perel and Karen Sliwa for their support and enthusiasm. The authors also thank  
12  
13 505 the local staff at the rural and urban primary healthcare facilities for their engagement in this  
14  
15 506 research.  
16  
17  
18  
19 507  
20  
21

22 508 **REFERENCES**  
23  
24  
25

- 26 509 1. Abajobir AA, Abate KH, Abbafati C, Abbas KM, Abd-Allah F, Abdulle AM, Abera  
27 510 SF, Aboyans V, Abu-Raddad LJ, Abu-Rmeileh NME *et al*: **Global, regional, and**  
28 511 **national comparative risk assessment of 84 behavioural, environmental and**  
29 512 **occupational, and metabolic risks or clusters of risks, 1990–2016: a systematic**  
30 513 **analysis for the Global Burden of Disease Study 2016.** *The Lancet* 2017,  
31 514 **390(10100):1345-1422.**  
32 515 2. Mills KT, Bundy JD, Kelly TN, Reed JE, Kearney PM, Reynolds K, Chen J, He J:  
33 516 **Global Disparities of Hypertension Prevalence and Control: A Systematic**  
34 517 **Analysis of Population-Based Studies From 90 Countries.** *Circulation* 2016,  
35 518 **134(6):441-450.**  
36 519 3. Ataklte F, Erqou S, Kaptoge S, Taye B, Echouffo-Tcheugui JB, Kengne AP: **Burden**  
37 520 **of undiagnosed hypertension in sub-saharan Africa: a systematic review and**  
38 521 **meta-analysis.** *Hypertension* 2015, **65(2):291-298.**  
39 522 4. de-Graft Aikins A, Unwin N, Agyemang C, Allotey P, Campbell C, Arhinful D:  
40 523 **Tackling Africa's chronic disease burden: from the local to the global.**  
41 524 *Globalization and Health* 2010, **6(1):5.**  
42 525 5. Echouffo-Tcheugui JB, Kengne AP, Erqou S, Cooper RS: **High Blood Pressure in**  
43 526 **Sub-Saharan Africa: The Urgent Imperative for Prevention and Control.** *The*  
44 527 *Journal of Clinical Hypertension* 2015, **17(10):751-755.**  
45 528 6. **National Population Estimates: Population 2006-2016.** Nigerian National Bureau of  
46 529 Statistics; 2016. Available from:  
47 530 <http://nigerianstat.gov.ng/elibrary?page=36&offset=350> accessed 1st June 2018.  
48 531 7. Ogah OS, Okpechi I, Chukwuonye, II, Akinyemi JO, Onwubere BJ, Falase AO, Stewart  
49 532 S, Sliwa K: **Blood pressure, prevalence of hypertension and hypertension related**  
50 533 **complications in Nigerian Africans: A review.** *World J Cardiol* 2012, **4(12):327-340.**  
51 534 8. Ogedegbe G: **Barriers to optimal hypertension control.** *J Clin Hypertens*  
52 535 *(Greenwich)* 2008, **10(8):644-646.**  
53 536 9. Siegel D: **Barriers to and Strategies for Effective Blood Pressure Control.** *Vascular*  
54 537 *Health and Risk Management* 2005, **1(1):9-14.**  
55 538 10. Khatib R, Schwalm J-D, Yusuf S, Haynes RB, McKee M, Khan M, Nieuwlaat R:  
56 539 **Patient and Healthcare Provider Barriers to Hypertension Awareness, Treatment**

- 1  
2  
3 540 **and Follow Up: A Systematic Review and Meta-Analysis of Qualitative and**  
4 541 **Quantitative Studies.** *PloS one* 2014, **9(1):e84238.**
- 5 542 11. Okwuonu CG, Ojimađu NE, Okaka EI, Akemokwe FM: **Patient-related barriers to**  
6 543 **hypertension control in a Nigerian population.** *International Journal of General*  
7 544 *Medicine* 2014, **7:345-353.**
- 8 545 12. Odusola AO, Hendriks M, Schultsz C, Bolarinwa OA, Akande T, Osibogun A,  
9 546 Agyemang C, Ogedegbe G, Agbede K, Adenusi P *et al*: **Perceptions of inhibitors and**  
10 547 **facilitators for adhering to hypertension treatment among insured patients in**  
11 548 **rural Nigeria: a qualitative study.** *BMC Health Serv Res* 2014, **14:624.**
- 12 549 13. Jain Y, Jain P: **Communitisation of healthcare: peer support groups for chronic**  
13 550 **disease care in rural India.** *Bmj* 2018, **360:k85.**
- 14 551 14. **Reaching closer to home: Progress implementing community-based and other**  
15 552 **adherence strategies supporting people on HIV treatment.** Medicins Sans  
16 553 Frontières & Southern Africa Medical Unit (SAMU); 2013 [updated 3 December  
17 554 2013]. Available from: [https://samumsf.org/sites/default/files/2017-](https://samumsf.org/sites/default/files/2017-07/5_eng_reaching_closer_to_home_2013.pdf)  
18 555 [07/5\\_eng\\_reaching\\_closer\\_to\\_home\\_2013.pdf](https://samumsf.org/sites/default/files/2017-07/5_eng_reaching_closer_to_home_2013.pdf) accessed 1st June 2018.
- 19 556 15. Wilkinson LS: **ART adherence clubs: A long-term retention strategy for clinically**  
20 557 **stable patients receiving antiretroviral therapy.** *Southern African Journal of HIV*  
21 558 *Medicine; Vol 14, No 2 (2013)* 2013.
- 22 559 16. **Community-based antiretroviral therapy delivery: experiences from MSF.** Joint  
23 560 United Nations Programme on HI/AIDS (UNAIDS) and Medicins Sans Frontières;  
24 561 2015 [updated 20 April 2015]. Available from:  
25 562 [http://www.unaids.org/en/resources/documents/2015/20150420\\_MSF\\_UNAIDS\\_JC2\\_](http://www.unaids.org/en/resources/documents/2015/20150420_MSF_UNAIDS_JC2_707)  
26 563 [707](http://www.unaids.org/en/resources/documents/2015/20150420_MSF_UNAIDS_JC2_707) accessed 1st June 2018.
- 27 564 17. **ART adherence club: Report and Toolkit.** Medicins Sans Frontières; 2014 [updated  
28 565 October 2014]. Available from: [https://samumsf.org/sites/default/files/2017-07/ART-](https://samumsf.org/sites/default/files/2017-07/ART-Adherence-Club-REPORT-and-TOOLKIT_OCT2014.pdf)  
29 566 [Adherence-Club-REPORT-and-TOOLKIT\\_OCT2014.pdf](https://samumsf.org/sites/default/files/2017-07/ART-Adherence-Club-REPORT-and-TOOLKIT_OCT2014.pdf) accessed 1st June 2018.
- 30 567 18. Grimsrud A, Sharp J, Kalombo C, Bekker L-G, Myer L: **Implementation of**  
31 568 **community-based adherence clubs for stable antiretroviral therapy patients in**  
32 569 **Cape Town, South Africa.** *Journal of the International AIDS Society* 2015,  
33 570 **18(1):19984.**
- 34 571 19. Luque-Fernandez MA, Van Cutsem G, Goemaere E, Hilderbrand K, Schomaker M,  
35 572 Mantangana N, Mathee S, Dubula V, Ford N, Hernan MA *et al*: **Effectiveness of**  
36 573 **patient adherence groups as a model of care for stable patients on antiretroviral**  
37 574 **therapy in Khayelitsha, Cape Town, South Africa.** *PloS one* 2013, **8(2):e56088.**
- 38 575 20. Bango F, Ashmore J, Wilkinson L, van Cutsem G, Cleary S: **Adherence clubs for**  
39 576 **long-term provision of antiretroviral therapy: cost-effectiveness and access**  
40 577 **analysis from Khayelitsha, South Africa.** *Tropical medicine & international health :*  
41 578 *TM & IH* 2016, **21(9):1115-1123.**
- 42 579 21. Population in Abakaliki city. 2006. Available from:  
43 580 <https://en.wikipedia.org/wiki/Abakaliki> accessed 18 October 2018.
- 44 581 22. Population in Abakaliki Local Government Area. 2006. Available from:  
45 582 <https://www.citypopulation.de/php/nigeria-admin.php?adm2id=NGA011001> accessed  
46 583 18 October 2018.
- 47 584 23. Population in Oyi Local Government Area. 2006. Available from:  
48 585 <https://www.citypopulation.de/php/nigeria-admin.php?adm2id=NGA004021> accessed  
49 586 18 October 2018.
- 50 587 24. Decroo T, Rasschaert F, Telfer B, Remartinez D, Laga M, Ford N: **Community-based**  
51 588 **antiretroviral therapy programs can overcome barriers to retention of patients**

- 1  
2  
3 589 **and decongest health services in sub-Saharan Africa: a systematic review.**  
4 590 *International health* 2013, **5**(3):169-179.
- 5 591 25. Haberer JE, Sabin L, Amico KR, Orrell C, Galárraga O, Tsai AC, Vreeman RC, Wilson  
6 592 I, Sam-Agudu NA, Blaschke TF *et al*: **Improving antiretroviral therapy adherence**  
7 593 **in resource-limited settings at scale: a discussion of interventions and**  
8 594 **recommendations.** *Journal of the International AIDS Society* 2017, **20**(1):21371.
- 9 595 26. Luque-Fernandez MA, Van Cutsem G, Goemaere E, Hilderbrand K, Schomaker M,  
10 596 Mantangana N, Mathee S, Dubula V, Ford N, Hernán MA *et al*: **Effectiveness of**  
11 597 **Patient Adherence Groups as a Model of Care for Stable Patients on**  
12 598 **Antiretroviral Therapy in Khayelitsha, Cape Town, South Africa.** *PLOS ONE*  
13 599 2013, **8**(2):e56088.
- 14 600 27. Bango F WL, Van Cutsem G, Cleary S: **Cost-effectiveness of ART adherence clubs**  
15 601 **for long-term management of clinically stable ART patients.** In: *International*  
16 602 *Conference on AIDS and STIs in Africa (ICASA 2013)*. Cape Town, South Africa; 2013.

19  
20 603  
21  
22

23 604 **Figure 1: A model of club-based medication delivery strategy in hypertension context**  
24  
25 605 **from CLUBMEDS Study being implemented in Nigeria**

26  
27  
28 606 Note: P refers to a patient or club member.  
29  
30  
31  
32  
33  
34  
35  
36  
37  
38  
39  
40  
41  
42  
43  
44  
45  
46  
47  
48  
49  
50  
51  
52  
53  
54  
55  
56  
57  
58  
59  
60

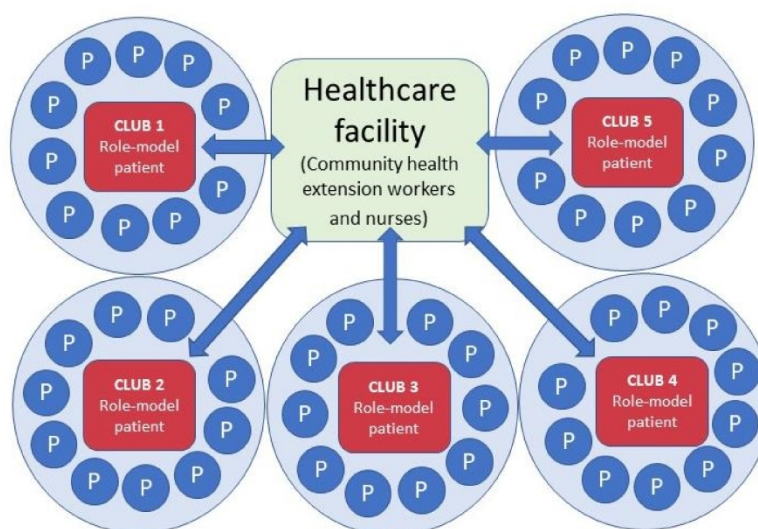

Figure 1: A model of club-based medication delivery strategy in hypertension context from CLUBMEDS Study being implemented in Nigeria

297x210mm (300 x 300 DPI)

# BMJ Open

## Adapting a club-based medication delivery strategy to a hypertension context: The CLUBMEDS Study in Nigeria

|                                 |                                                                                                                                                                                                                                                                                                                                                                                                                                                                                                                                                                                                                                                                                                                                                                                                              |
|---------------------------------|--------------------------------------------------------------------------------------------------------------------------------------------------------------------------------------------------------------------------------------------------------------------------------------------------------------------------------------------------------------------------------------------------------------------------------------------------------------------------------------------------------------------------------------------------------------------------------------------------------------------------------------------------------------------------------------------------------------------------------------------------------------------------------------------------------------|
| Journal:                        | <i>BMJ Open</i>                                                                                                                                                                                                                                                                                                                                                                                                                                                                                                                                                                                                                                                                                                                                                                                              |
| Manuscript ID                   | bmjopen-2019-029824.R1                                                                                                                                                                                                                                                                                                                                                                                                                                                                                                                                                                                                                                                                                                                                                                                       |
| Article Type:                   | Protocol                                                                                                                                                                                                                                                                                                                                                                                                                                                                                                                                                                                                                                                                                                                                                                                                     |
| Date Submitted by the Author:   | 07-Jun-2019                                                                                                                                                                                                                                                                                                                                                                                                                                                                                                                                                                                                                                                                                                                                                                                                  |
| Complete List of Authors:       | Santo, Karla ; University of Sydney, Westmead Applied Research Centre, Faculty of Medicine and Health; The George Institute for Global Health, Cardiovascular Division<br>ISIGUZO, Godsent; University of Cape Town, Medicine; Federal teaching Hospital Abakaliki , Medicine<br>Atkins, Emily; The George Institute for Global Health, Cardiovascular Division<br>Mishra, Shiva; The University of Queensland, Division of Epidemiology and Biostatistics, Faculty of Medicine; Nepal Development Society<br>Panda, Rajmohan; Public Health Foundation of India, research<br>Mbau, Lilian; Amref Health Africa<br>Fayomi, Samuel; Primary Health Centre Awkuzu<br>Ugwu, Collins; Federal Teaching Hospital Abakaliki<br>Odili, Augustine; University of Abuja<br>Virani, Salim; Baylor College of Medicine, |
| <b>Primary Subject Heading</b>: | Cardiovascular medicine                                                                                                                                                                                                                                                                                                                                                                                                                                                                                                                                                                                                                                                                                                                                                                                      |
| Secondary Subject Heading:      | Global health                                                                                                                                                                                                                                                                                                                                                                                                                                                                                                                                                                                                                                                                                                                                                                                                |
| Keywords:                       | Medication adherence, Peer-support groups, Adherence clubs, Hypertension < CARDIOLOGY, Anti-hypertensives                                                                                                                                                                                                                                                                                                                                                                                                                                                                                                                                                                                                                                                                                                    |
|                                 |                                                                                                                                                                                                                                                                                                                                                                                                                                                                                                                                                                                                                                                                                                                                                                                                              |

SCHOLARONE™  
Manuscripts

1  
2  
3 1 **TITLE**  
4  
5

6 2 Adapting a club-based medication delivery strategy to a hypertension context: The  
7  
8 3 CLUBMEDS Study in Nigeria  
9  
10

11 4 **AUTHORS**  
12  
13

14 5 Karla Santo<sup>1,2</sup>  
15

16 6 Godsent C. Isiguzo<sup>3,4</sup>  
17

18 7 Emily Atkins<sup>1</sup>  
19

20 8 Shiva Raj Mishra<sup>5,6</sup>  
21

22 9 Raj Panda<sup>7</sup>  
23

24 10 Lilian Mbau<sup>8</sup>  
25

26 11 Samuel B. Fayomi<sup>9</sup>  
27

28 12 Collins Ugwu<sup>4</sup>  
29

30 13 Augustine Odili<sup>10</sup>  
31

32 14 Salim Virani<sup>11</sup>  
33  
34  
35  
36  
37  
38  
39

40 16 **AFFILIATIONS**  
41

42 17 1. The George Institute for Global Health, University of New South Wales, Sydney,  
43  
44 18 Australia

45 19 2. Westmead Applied Research Centre, Faculty of Medicine and Health, The University  
46  
47 20 of Sydney, Sydney, Australia

48 21 3. University of Cape Town, Cape Town, South Africa  
49

50 22 4. Federal Teaching Hospital Abakaliki, Abakaliki, Nigeria  
51

52 23 5. Division of Epidemiology and Biostatistics, Faculty of Medicine, The University of  
53  
54 24 Queensland, Brisbane, Australia  
55  
56  
57  
58  
59  
60

- 25 6. Nepal Development Society, Bharatpur, Nepal
- 26 7. Public Health Foundation of India, New Delhi, India
- 27 8. Amref Health Africa, Nairobi, Kenya
- 28 9. Primary Health Centre Awkuzu, Awkuzu, Nigeria
- 29 10. University of Abuja, Abuja, Nigeria
- 30 11. Michael E. DeBakey Veterans Affairs Medical Center & Baylor College of Medicine,  
31 Houston, United States of America

32

33 **CORRESPONDING AUTHOR**

34 Karla Santo

35 Westmead Applied Research Centre, The University of Sydney at Westmead Hospital, PO Box  
36 154, Westmead, NSW 2154, Australia

37 Email: [ksanto@georgeinstitute.org.au](mailto:ksanto@georgeinstitute.org.au)

38 Phone: +61 2 8052 4620

39

40 **WORD COUNT: 4054 (max. 4000) – Excluding title page, abstract, strengths and**  
41 **limitations, tables, figures, declarations and references.**

42 **BOXES: 1**

43 **FIGURES: 1**

44

45

1  
2  
3 46 **ABSTRACT**  
4  
5

6 47 **INTRODUCTION:** The prevalence of hypertension in sub-Saharan Africa (SSA) is among  
7  
8 48 the world's highest; however, awareness, treatment and control of hypertension in this region  
9  
10 49 are sub-optimal. Among other barriers, the overburdened healthcare system poses a great  
11  
12 50 challenge for hypertension control. Community peer-support groups are an alternative and  
13  
14 51 promising strategy to improve adherence and blood pressure (BP) control. The CLUBMEDS  
15  
16 52 study aims to evaluate the feasibility and impact of adherence clubs to improve hypertension  
17  
18 53 control in Nigeria.  
19  
20  
21  
22

23 54 **METHODS AND ANALYSIS:** The CLUBMEDS study will include a formative (pre-  
24  
25 55 implementation) qualitative evaluation, a pilot study and a process (post-implementation)  
26  
27 56 qualitative evaluation. At the formative stages, focus group discussions with patient groups and  
28  
29 57 in-depth interviews with healthcare providers, managers and key decision makers will be  
30  
31 58 conducted to understand the feasibility, barriers and facilitators, opportunities and challenges  
32  
33 59 for the successful implementation of the CLUBMEDS strategy. The CLUBMEDS pilot study  
34  
35 60 will be implemented in two primary healthcare facilities, one urban and one rural, in Southeast  
36  
37 61 Nigeria. Each adherence club, which consists of a group of 10-15 patients with hypertension  
38  
39 62 under the leadership of a role-model patient, serves as a support group to encourage and  
40  
41 63 facilitate adherence, BP self-monitoring and medication delivery on a monthly basis. A process  
42  
43 64 evaluation will be conducted at the end of the pilot study to evaluate the acceptability and  
44  
45 65 engagement with the CLUBMEDS strategy. To date, 104 patients were recruited and grouped  
46  
47 66 into 9 clubs, in which patients will be followed-up for six months.  
48  
49  
50  
51  
52  
53

54 67 **ETHICS AND DISSEMINATION:** The study was approved by the University of Abuja  
55  
56 68 Teaching Hospital and the Federal Teaching Hospital Abakaliki Human Research Ethics  
57  
58 69 Committees and all patients provided informed consent. Our findings will provide preliminary  
59  
60



1  
2  
3 70 data on the potential effectiveness and acceptance of this strategy in a hypertension context.  
4  
5  
6 71 Study findings will be disseminated via scientific forums.  
7  
8  
9 72

10  
11  
12 73 **ABSTRACT WORD COUNT: 299 (max. 300)**  
13  
14  
15 74

16  
17  
18 75 **KEYWORDS:** Medication adherence, peer-support groups, adherence clubs, hypertension,  
19  
20 76 anti-hypertensives  
21  
22  
23  
24 77  
25  
26  
27 78  
28  
29  
30 79  
31  
32  
33 80  
34  
35  
36 81  
37  
38  
39 82  
40  
41  
42 83  
43  
44  
45 84  
46  
47  
48 85  
49  
50  
51 86  
52  
53  
54  
55 87  
56  
57  
58 88  
59  
60

## 89 STRENGTHS AND LIMITATIONS OF THIS STUDY

- 90 • Hypertension prevalence in sub-Saharan Africa (SSA) is among the world's highest;  
91 however, access to anti-hypertensive treatment is limited by significant health system,  
92 geographical and financial barriers.
- 93 • Alternative models of care using community peer-support groups are a promising  
94 strategy to overcome these barriers to hypertension control and reach those patients  
95 who are not captured in regular healthcare settings.
- 96 • Adherence clubs, which consists of groups of 10-15 patients with hypertension under  
97 the leadership of a role-model patient, might be a promising strategy, serving as a  
98 support group to encourage and facilitate adherence, blood pressure self-monitoring  
99 and medication delivery.
- 100 • The CLUBMEDS study, which will include a formative (pre-implementation)  
101 qualitative evaluation, a pilot study and a process (post-implementation) qualitative  
102 evaluation, aims to evaluate the feasibility and impact of adherence clubs to improve  
103 hypertension control in Nigeria.
- 104 • This study is a pilot study and, therefore, it is limited by its small sample size and short-  
105 term follow-up; however, the study findings will provide preliminary data on the  
106 potential effectiveness and acceptance of this strategy in a hypertension context.

107

## 108 INTRODUCTION

### 109 The Burden of Hypertension in Sub-Saharan Africa and Nigeria

110 Hypertension is the second leading risk factor for lost disability-adjusted life-years (DALYs)  
111 in men and the leading risk factor in women globally.[1] Despite the global effort to mitigate  
112 the impact of hypertension worldwide, it remains a major public health threat, accounting for  
113 10.5 million deaths in 2016.[1] The estimated prevalence of hypertension was 28.5% in high-  
114 income countries (HICs) and 31.5% in low and middle-income countries (LMICs), accounting  
115 for 349 million and 1.04 billion people living with hypertension, respectively, in 2010.[2] In  
116 addition, the estimated awareness, treatment and control rates for hypertension were 37.9%,  
117 29.0% and 7.7%, respectively, in LMICs; while in HICs they were estimated to be 67.0%,  
118 55.6% and 28.4%, respectively.[2]

119

120 The prevalence of hypertension in sub-Saharan Africa (SSA) is among the world's highest,  
121 having been reported to vary between 15% and 70% among SSA countries, with an average of  
122 30%.[3] Approximately 128.6 million people in SSA were living with hypertension in 2010,  
123 having increased from 50.4 million in 2000.[2] Furthermore, it is known that mortality and  
124 morbidity rates associated with hypertension and its complications, such as ischaemic heart  
125 disease, stroke and heart failure, are higher in SSA when compared to other regions of the  
126 world.[4] This high prevalence of complications is worsened by the low rates of hypertension  
127 awareness (27%), treatment (18%) and control (7%) in SSA.[3] In addition, many SSA  
128 countries struggle to appropriately tackle hypertension, as they face a double burden of  
129 communicable and chronic diseases, and often healthcare spending on communicable diseases  
130 is prioritised, resulting in hypertension-related healthcare spending not being enough to cover  
131 the costs of basic diagnostic equipment, health workers training and treatment supplies.[4, 5]

1  
2  
3 132 Nigeria is the most populous country in Africa with an estimated population of 193 million in  
4  
5 133 2016.[6] Like other SSA countries, the prevalence and complication rates of hypertension in  
6  
7 134 Nigeria are high, while hypertension awareness, treatment and control are low. The prevalence  
8  
9 135 of hypertension in Nigeria was estimated to be 22.5%, while hypertension awareness was  
10  
11 136 estimated to be between 14.2% and 30%, treatment between 18.6 and 21.0% and control  
12  
13 137 between 5.0% and 17.5%).[7] Therefore, hypertension is a major public health challenge in  
14  
15 138 this country.  
16  
17  
18  
19  
20 139

### 23 140 **Barriers to Blood Pressure Control**

24  
25  
26 141 There are three major categories of barriers to control of hypertension: 1) patient-related, 2)  
27  
28 142 provider-related, and 3) healthcare system-related.[8, 9] In Nigeria, a 2014 study evaluated  
29  
30 143 patient-related barriers and found that poor knowledge of consequences of inadequate BP  
31  
32 144 control, forgetfulness in taking BP medications and non-affordability of medications were  
33  
34 145 associated with poor hypertension control.[10] Another study from Nigeria reported that the  
35  
36 146 main barriers to medication adherence and BP control included healthcare system-related  
37  
38 147 barriers, such as inconvenient clinic operating hours, long waiting times and under-dispensing  
39  
40 148 of prescribed medications, when due to the lack of availability of anti-hypertensive medications  
41  
42 149 the pharmacists dispense a smaller quantity of pills than needed by the patients.[11] Patient-  
43  
44 150 related barriers were also reported, such as the lack of knowledge that regular medication use  
45  
46 151 is needed and interruption of the anti-hypertensive treatment due to side effects or  
47  
48 152 cultural/faith-motivated reasons.[11] To overcome some of these barriers, alternative models  
49  
50 153 of care, in which there is a shift of the provision of care and treatment from the healthcare  
51  
52 154 facilities to the community are needed.  
53  
54  
55  
56  
57  
58  
59  
60

## 156 **Community-Based Models of Care**

157 The term communitisation of healthcare has been previously used to describe the shift in how  
158 healthcare is delivered, in which patients, communities and healthcare systems share the  
159 responsibility for finding solutions to healthcare problems and challenges.[12] Peer support  
160 groups are an example of this concept of communitisation of care. Peer support groups consist  
161 of groups of patients with the same health condition, in which the patients support each other  
162 and share the challenges, and often the solutions, of living with that specific chronic health  
163 condition. Previous studies have shown that peer support groups improve patient experience,  
164 adherence, health outcomes and service use among patients with different health conditions,  
165 mainly mental illness and HIV/AIDS.[12]

166

167 In the HIV/AIDS context, different types of peer support groups have been studied and shown  
168 to be effective. One of these types of peer support groups are the so-called adherence clubs. In  
169 these adherence clubs, lay counsellors, who act as the club facilitators, dispense medication to  
170 stable patients in a community setting.[13-15] The lay counsellors also measure weight,  
171 conduct symptom-based general assessments and provide peer support to encourage  
172 medication adherence.[16] A few studies in patients with HIV/AIDS in South Africa have  
173 shown that this club-based strategy improved adherence, reduced virological rebound and  
174 improved retention in care.[14, 17-19]

175

176 The adherence clubs were proven effective in the HIV/AIDS setting and it has the potential to  
177 be translated to other chronic diseases, such as hypertension. However, to date, this club-based  
178 strategy has not been evaluated in other chronic disease conditions. Therefore, the

1  
2  
3 179 CLUBMEDS study aims to evaluate a community club-based strategy to deliver anti-  
4  
5 180 hypertensive medication to patients with hypertension in Southeast Nigeria.  
6  
7  
8  
9 181

## 11 182 **METHODS AND ANALYSIS**

### 13 183 **The CLUBMEDS Study**

14  
15  
16  
17  
18 184 The CLUBMEDS study aims to evaluate the feasibility and impact of adherence clubs to  
19  
20 185 improve hypertension control in Nigeria. For a community-based model/strategy to work, it is  
21  
22 186 essential to involve the patients, their relatives and the whole community in the planning and  
23  
24 187 implementation of such strategy. Before implementing any community-based strategy, it is  
25  
26 188 important to understand patients' preferences, the barriers and facilitators from various  
27  
28 189 stakeholders' perspectives, including patients, healthcare providers and the health system  
29  
30 190 managers. Therefore, this feasibility evaluation will provide valuable insights for future  
31  
32 191 implementation of a community club-based medication delivery strategy in a larger scale and  
33  
34 192 will guide important adaptations to the model depending on the context it is being implemented.  
35  
36  
37  
38  
39  
40  
41  
42

43 194 The CLUBMEDS study will include a formative (pre-implementation) qualitative evaluation,  
44  
45 195 a pilot study and a process (post-implementation) qualitative evaluation.  
46  
47  
48  
49  
50

### 51 197 **Patient and Public involvement statement**

52  
53  
54 198 It is important to acknowledge that patients will be involved in the development of this study.  
55  
56  
57  
58  
59

### 60 200 **Formative qualitative evaluation**

1  
2  
3 201 As part of the CLUBMEDS study, a qualitative evaluation will be done at the formative stage  
4  
5 202 of the strategy. Focus group discussions with patient groups and in-depth interviews with  
6  
7 203 healthcare providers, managers and key decision makers will be conducted to understand the  
8  
9 204 feasibility, barriers and facilitators, opportunities and challenges for the successful  
10  
11 205 implementation of the CLUBMEDS strategy. This qualitative evaluation will also help build  
12  
13 206 ownership of the CLUBMEDS strategy among the stakeholders. We will explore three main  
14  
15 207 conceptual areas; 1) current understanding of hypertension and the health risks associated with  
16  
17 208 it, 2) the challenges faced in accessing and adhering to medications by those who are using  
18  
19 209 anti-hypertensive medications, and 3) the perceived value and acceptability of future  
20  
21 210 implementation of the CLUBMEDS strategy.  
22  
23  
24  
25  
26  
27  
28

### 29 212 **The CLUBMEDS pilot study**

30  
31  
32 213 The CLUBMEDS pilot study will be implemented in two primary healthcare facilities, one  
33  
34 214 urban and one rural, in Southeast Nigeria. The urban site is located at Abakaliki, the capital  
35  
36 215 city of Ebonyi State. According to the 2006 census, the population in Abakaliki city was  
37  
38 216 79,280, while in the Abakaliki Local Government Area was 149,683.[20, 21] To date, there is  
39  
40 217 no published data on the prevalence of hypertension in Abakaliki, however, a study in a nearby  
41  
42 218 urban city of Enugu with similar population characteristics reported an overall prevalence of  
43  
44 219 hypertension of 42%. The rural site is located at Awkuzu, a town in Oyi Local Government  
45  
46 220 Area of Anambra State. According to the 2006 census, population of Oyi Local Government  
47  
48 221 Area was 168,201, [22] however there is no published data on the Awkuzu's population.  
49  
50 222 According to the unpublished report of the Removing the Mask on Hypertension (REMAH)  
51  
52 223 project, prevalence, treatment and control of hypertension in Awkuzu is 18.61%, 8.23% and  
53  
54 224 1.98%, respectively.  
55  
56  
57  
58  
59  
60

1  
2  
3 226 The structure of the CLUBMEDS pilot study will mimic the structure used in the HIV/AIDS  
4  
5 227 adherence clubs. The CLUBMEDS adherence clubs will consist of one role-model patient, who  
6  
7  
8 228 will act as the club facilitator, and between 10 to 15 male and female patients with hypertension,  
9  
10 229 who will be called club members. The adherence clubs will meet on a monthly basis for six  
11  
12 230 months. Between three to five adherence clubs will be formed in each primary healthcare  
13  
14 231 facility. As this is a pilot study evaluating the feasibility of the CLUBMEDS strategy, we are  
15  
16 232 aiming to recruit a convenient sample of 100 patients (Figure 1). In each primary healthcare  
17  
18 233 facility, community health extension workers (CHEWs) and nurses will be the point of contact  
19  
20 234 for any clinical support to the adherence clubs.  
21  
22  
23  
24  
25

#### 26 236 Recruitment and training

27  
28 237 Research nurses working on the CLUBMEDS study will recruit hypertensive patients in each  
29  
30 238 primary healthcare facility to participate in the CLUBMEDS strategy. To be eligible to  
31  
32 239 participate in the study, patients will have to have a confirmed diagnosis of hypertension and  
33  
34 240 be indicated for treatment with anti-hypertensive medications, irrespective of their level of  
35  
36 241 adherence at baseline. All patients will be required to provide informed consent to participate  
37  
38 242 in the study. After obtaining informed consent, the research nurse will perform a baseline  
39  
40 243 assessment, in which information on demographics, hypertension history, comorbidities,  
41  
42 244 lifestyle risk factors, anti-hypertensive medications being taken, and medication adherence will  
43  
44 245 be collected. In addition, BP measurements will be performed using an automated BP monitor.  
45  
46 246 Among the enrolled patients, the research nurses will then identify and select patients that are  
47  
48 247 eligible to be the role-mode patients. To be eligible to be a role-model patient, the selected  
49  
50 248 patients will have to meet the following criteria:  
51  
52  
53  
54

- 55  
56 249 1) Be considered adherent to the anti-hypertensive treatment, if they:  
57  
58  
59  
60



- 1  
2  
3 250           • have collected the anti-hypertensive medication every month in the last six  
4  
5 251           months, and  
6  
7  
8 252           • have attended the primary healthcare facility at least twice in the last six months;  
9  
10 253       2) Have at least secondary school completion;  
11  
12 254       3) Agree to take the responsibility of acting as the club facilitator.  
13  
14  
15 255

16  
17 256   After identifying and selecting the role-model patients, the research nurses will provide training  
18  
19 257   on BP monitoring, management of hypertension and how the CLUBMEDS strategy will work  
20  
21 258   to both the role-model patients and the facility CHEWs. CHEWs will participate in a 3-day  
22  
23 259   training program, while role-model patients will receive a simplified and tailored 1-day training  
24  
25  
26 260   program. The training will include:

- 27  
28  
29 261       • Basic information on hypertension:  
30  
31 262           ▪ Epidemiology, causes, related risk factors, diagnosis and management of  
32  
33 263           hypertension;  
34  
35 264           ▪ Information on non-pharmacologic management of hypertension;  
36  
37 265           ▪ Information on the importance of adherence to anti-hypertensive medications;  
38  
39 266           ▪ Information on the importance of regular BP checks.  
40  
41  
42 267       • Training on:  
43  
44 268           ▪ How to measure BP appropriately with an automated BP monitor;  
45  
46 269           ▪ How to identify alert signs, e.g. uncontrolled and complications of high BP;  
47  
48 270           ▪ Management of the adherence clubs, including how to register the patients,  
49  
50 271           record data in the register and distribute the medications to the patients (only to  
51  
52 272           role-model patients).  
53  
54  
55 273

1  
2  
3 274 Finally, the research nurses will help the patients to form the CLUBMEDS adherence clubs by  
4  
5 275 assigning one role-model patient and around 10 to 15 patients with hypertension, the club  
6  
7 276 members, to an adherence club based on their domiciliary proximity. Once the adherence clubs  
8  
9  
10 277 are formed, the patients take responsibility on the overall running of the clubs.  
11

12 278

13  
14 279 CLUBMEDS monthly sessions

15  
16  
17  
18 280 The CLUBMEDS adherence clubs will meet on a monthly basis in a local community centre.

19  
20 281 The role-model patient and the club members will decide which day and time the clubs will

21  
22 282 meet on a regular basis, e.g. every last Sunday of the month at 6:00pm. The monthly adherence

23  
24 283 club meeting will be open for club members relatives or friends who wish to attend and support

25  
26 284 the club members in adhering to their anti-hypertensive treatment.  
27  
28  
29

30 285

31  
32  
33 286 The role-model patients will act as the club facilitators, being responsible for preparing and

34  
35 287 running the club sessions, including the following tasks:  
36  
37

38  
39 288 • Preparing for the club session, which includes ensuring that the anti-hypertensive  
40  
41 289 medication refills are ordered from the pharmacist at the healthcare facility and ready  
42  
43 290 for pick-up before the club session;

44  
45  
46 291 • Registering club members by writing the club members' names in the CLUBMEDS  
47  
48 292 monthly session register when they arrive to the club session;

49  
50 293 • Measuring the club members' BP using an automated BP monitor;

51  
52 294 • Delivering the anti-hypertensive medications to each club member;

53  
54  
55 295 • Recording information in the CLUBMEDS monthly session register, including: the BP  
56  
57 296 measurements, the quantity of pills returned by the club members, if any, and the  
58  
59 297 quantity of pills provided to each club member in the current club session;

- 1  
2  
3 298 • Supporting/educating the club members about adherence;  
4  
5  
6 299 • Identifying any symptoms and alert signs for complications of uncontrolled  
7  
8 300 hypertension in the club members, e.g. extremely high levels of BP, severe headache,  
9  
10 301 dizziness, blurred vision, nausea/vomiting, nosebleeds, chest pain/shortness of breath,  
11  
12 302 etc;  
13  
14  
15 303 • Referring club members back to the primary healthcare facility to be evaluated by a  
16  
17 304 CHEW or nurse, if symptom/alert signs are present or, if the club member is due to a  
18  
19 305 regular 6 months check-up at the facility;  
20  
21  
22 306 • After the club session, returning any uncollected medications to the pharmacy and  
23  
24 307 following-up with club members who missed the club session.

25  
26  
27 308 Given that their responsibilities are quite extensive, the role-model patients will receive some  
28  
29 309 incentives to be the club facilitators. The role-model patients will be able to keep the automated  
30  
31 310 BP monitor after the study completion and will receive financial support to purchase BP  
32  
33 311 monitor batteries and for transportation to the facility.

34  
35  
36  
37 312 The facility CHEWs and nurses will be the point of contact for the role-model patients and club  
38  
39 313 members in the primary healthcare facilities to support to the overall conduct of the adherence  
40  
41 314 clubs and to help resolve any adherence-related issues that role-model patients might not be  
42  
43 315 able to address during the club meetings. However, the CHEWs and nurses will not be present  
44  
45 316 in the CLUBMEDS monthly sessions. The facility CHEWs and nurses will be still responsible  
46  
47 317 for the clinical management of the patients participating in the CLUBMEDS study by:

- 48  
49  
50  
51  
52 318 • Ensuring the six-monthly scripting for club members;  
53  
54 319 • Scheduling regular return visits to the facility for club members every six months;  
55  
56  
57 320 • Up-titrating or changing the anti-hypertensive medications;  
58  
59  
60

- 1  
2  
3 321 • Evaluating club members with symptoms/alert signs who are referred to the facility by  
4  
5 322 the role-model patients and, if necessary, referring them to the hospital for further  
6  
7 323 evaluation, the Federal Teaching Hospital Abakiliki for club members from the urban  
8  
9 324 facility and the Chukwuemeka Odumegwu Ojukwu University Teaching Hospital  
10  
11 325 Awka for club members from the rural facility;  
12  
13  
14  
15 326 • Supporting the role-model patients in any club-related issues, if necessary.  
16  
17

18 327

21 328 Due to lack of pharmacists and pharmacist assistants at the facilities, the facility nurses and the  
22  
23 329 CHEWs will be responsible for pre-packing the anti-hypertensive medication refills for the  
24  
25 330 adherence clubs to be collected by the role-model patients before every CLUBMEDS monthly  
26  
27 331 session. There will be no regular physician involvement in the CLUBMEDS strategy due to  
28  
29 332 shortages of physicians working in the primary healthcare facilities involved in the study. In  
30  
31 333 these facilities, non-physicians (CHEWs and nurses) are the ones responsible for seeing and  
32  
33 334 handling the patients' health issues.  
34  
35  
36  
37

38 335

41 336 Data collection and outcomes

44 337 The CLUBMEDS strategy will be tested for six months and the outcome variables to be  
45  
46 338 evaluated during this pilot study are presented in Box 1. At six months, the role-model patients  
47  
48 339 and club members will be re-assessed by the CLUBMEDS research nurses. Data on medication  
49  
50 340 adherence, BP, hospitalisations due to cardiovascular clinical events and the anti-hypertensive  
51  
52 341 medications being taken by the participants will be collected by the research nurses. Medication  
53  
54 342 adherence will be assessed using a visual analogue scale, information on the number of pills  
55  
56 343 missed in the last seven days and pill count. Three BP measurements will be conducted using  
57  
58  
59  
60

1  
2  
3 344 an automated BP monitor (Omron model 705IT). The first BP measurement will be discarded  
4  
5 345 and the mean value of the last two measurements will be calculated. Data on the club  
6  
7 346 attendance, BP measurements and medication adherence collected during the club sessions will  
8  
9 347 be also evaluated. All data will be entered by the research nurses in a secure password-protected  
10  
11 348 electronic database (REDCap).  
12  
13  
14  
15 349

16  
17  
18 **Box 1: CLUBMEDS primary and secondary outcomes**

19  
20 **Primary**

- 21  
22  
23 • Medication adherence – Visual analog scale  
24

25  
26 **Secondary**

- 27  
28 • Medication adherence – Number of pills missed in the last 7 days and pill count  
29  
30 • Blood pressure – Resting, sitting automated digital recording, mean of last two readings  
31  
32 • Hospital admissions due to cardiovascular clinical events – Self-report  
33  
34 • Attendance to club sessions – CLUBMEDS monthly session register  
35  
36 • Acceptability and engagement with the CLUBMEDS strategy (As part of the process  
37  
38 qualitative evaluation)  
39  
40  
41  
42

43 350

44  
45 351 **Statistical analysis**

46  
47 352 Baseline data will be presented as means and standard deviations (SD) or medians and  
48  
49 353 interquartile ranges (IQR) for continuous variables, and as frequencies and percentages for  
50  
51 354 categorical variables. A pre-post analysis will be done for the analyses of the study outcomes.  
52  
53 355 Continuous variables will be analysed using t-tests and categorical variables using  $\chi^2$  tests as  
54  
55 356 appropriate. Mann-Whitney U tests will be used if data are not normally distributed.  
56  
57  
58  
59  
60

1  
2  
3 357 To further understand important determinants of medication adherence in our study population,  
4  
5 358 we will perform linear regression analyses using the visual analog scale as a continuous  
6  
7 359 variable. We will also perform logistic regression analyses using a defined cut-off on the visual  
8  
9 360 analog scale (e.g. adherence  $\geq 80\%$ ). The study team is well aware of the small sample size of  
10  
11 361 the pilot study and therefore, variable selection for these models will be parsimonious and the  
12  
13 362 results will only be hypothesis-generating.  
14  
15  
16

17 363

### 19 364 **Process qualitative evaluation**

21 365 A process evaluation will be conducted at the end of the pilot study (post-implementation stage)  
22  
23 366 to evaluate the acceptability and engagement with the CLUBMEDS strategy. Focus group  
24  
25 367 discussions with club members and in-depth interviews with the role-model patients, CHEWs,  
26  
27 368 nurses, pharmacists, and any other healthcare providers involved in the CLUBMEDS study  
28  
29 369 will be conducted to understand the strengths and weaknesses of the strategy, what worked and  
30  
31 370 what did not work, how can the strategy be adapted and improved according to any challenges  
32  
33 371 identified in this pilot study that might preclude the future successful implementation of the  
34  
35 372 CLUBMEDS strategy.  
36  
37  
38  
39

40 373

### 42 374 **CLUBMEDS Progress to Date**

44 375 The recruitment to the CLUBMEDS strategy started in March 2018. Two focus groups (18  
45  
46 376 male and 20 female participants) and five in-depth interviews were successfully conducted,  
47  
48 377 and more are being planned in both the urban and rural sites as part of the formative qualitative  
49  
50 378 evaluation. This qualitative data is currently being analysed and the findings will be published  
51  
52 379 in a separate paper.  
53  
54  
55  
56

57 380

1  
2  
3 381 To date, 104 patients were recruited to participate in the CLUBMEDS pilot study between  
4  
5 382 March and September 2018, being 82 in the urban site and 22 in the rural site. Nine role-model  
6  
7 383 patients were identified, selected and trained to run the adherence clubs in both sites. Seven  
8  
9 384 adherence clubs were formed in the urban site with between 10 and 13 club members in each  
10  
11 385 club, while two adherence clubs were formed in the rural site with 10 and 13 club members in  
12  
13 386 each club. At the baseline assessment, the recruited CLUBMEDS participants had a mean age  
14  
15 387 of 56.8 years (SD 10.7), 73 (70%) were women, and a mean BP of 146.7/86.9 mmHg (SD  
16  
17 388 20.1/11.2). The majority of participants reported taking only one (49.0%) or two (47.1%) anti-  
18  
19 389 hypertensive medications at the baseline assessment, while only 3.8% reported taking three  
20  
21 390 classes of anti-hypertensive medications. The median medication adherence percentage of anti-  
22  
23 391 hypertensive medications taken by the participants in the past month was 44.5% (IQR 30)  
24  
25 392 measured by the visual analogue scale. The CLUBMEDS monthly sessions are currently being  
26  
27 393 held successfully.  
28  
29  
30  
31  
32

33 394

34 395

## 35 396 **ETHICS AND DISSEMINATION**

36  
37  
38  
39  
40 397 The findings of this study will be disseminated via scientific forums including peer-reviewed  
41  
42 398 publications and presentations at international and national conferences. The study design and  
43  
44 399 conduct are being overseen by a steering committee (authors), a group of Emerging Leaders  
45  
46 400 from the World Heart Federation. This committee has expertise in large-scale clinical trials,  
47  
48 401 qualitative research and clinical CVD management. This study will adhere to the Declaration  
49  
50 402 of Helsinki, a statement of ethical principles for medical research involving human subjects.  
51  
52 403 The study was approved by the University of Abuja Teaching Hospital and the Federal  
53  
54 404 Teaching Hospital Abakaliki Human Research Ethics Committees and all patients provided  
55  
56 405 informed consent.  
57  
58  
59  
60

406

407 **DISCUSSION**

408 Hypertension is a major public health issue worldwide and even more so in LMICs, such as  
409 Nigeria. The current healthcare facility-based model of care has failed to provide appropriate  
410 care to ensure adequate BP control in patients with hypertension. Alternative models of care  
411 based on shared responsibility between patients, communities and the healthcare system might  
412 be the way forward. The CLUBMEDS study is one of the first studies evaluating a community  
413 club-based strategy to deliver anti-hypertensive medication to patients with hypertension in  
414 Nigeria, adapting a strategy that was shown to be effective in HIV/AIDS to the hypertension  
415 context.

416

417 In the HIV/AIDS context, a variety of innovative strategies to increase community engagement  
418 in the care and anti-retroviral therapy (ART) delivery have been piloted and studied in southern  
419 Africa in the last decade.[13, 15, 23, 24] Community-based models of ART delivery aims to  
420 improve retention in care, by separating drug delivery from clinical visits. From the patient  
421 perspective, the main advantages of these strategies are the reduction of travel costs and time  
422 spent in frequent clinic visits, and peer support encouragement at the community level.[13, 15]  
423 From the healthcare system's perspective, the major advantages are the reduction of staff  
424 workload, keeping the clinical staff focussed on clinical problems, and the encouragement of  
425 patient autonomy.[13, 15] One of these strategies that has been previously implemented and  
426 evaluated is the community-based ART adherence clubs, including facility-based and  
427 community-based adherence clubs.[13, 15]

428



1  
2  
3 429 Similar to the CLUBMEDS strategy, in the ART adherence club community-based medication  
4  
5 430 delivery strategy, lay counsellors dispensed the medications to stable patients in a community  
6  
7 431 setting, either in patients' home or at community venues.[13-15] The lay counsellors, who  
8  
9 432 acted as the club facilitators, were also responsible for measuring the patients' weight,  
10  
11 433 conducting symptom-based general assessments and providing peer support to encourage  
12  
13 434 medication adherence.[16] These ART adherence clubs, which had between 15-30 patients,  
14  
15 435 met regularly and were supported by a facility nurse.[16] An evaluation of the club-based  
16  
17 436 strategy for HIV/AIDS in South Africa showed that, less than 0.1% (9/2133) patients died and  
18  
19 437 0.3% (53/2133) were referred back to the facility due to clinical complications over 18  
20  
21 438 months.[17] In another study in South Africa, 12% more patients remained in care and were  
22  
23 439 67% less likely to experience virological rebound in the club-based strategy compared to clinic-  
24  
25 440 based care.[14, 25] This club-based strategy has also been shown to reduce costs and have  
26  
27 441 fewer barriers to ongoing access to care, including shorter waiting times, higher acceptability  
28  
29 442 of services and fewer missed clinic appointments.[26]

30  
31  
32  
33  
34  
35  
36 443

37  
38  
39 444 An important finding from these studies was that for the club-based strategy to be successful it  
40  
41 445 was essential that the medications, in this case the ART, were pre-packaged and labelled for  
42  
43 446 each patient at the facility, and that the club facilitator collected and transported the packs to  
44  
45 447 the meeting venue. Also, it was important that patients reporting any symptoms or adverse  
46  
47 448 effects, such as weight loss in the HIV/AIDS context, were referred back to the facility to be  
48  
49 449 assessed by a nurse, and that all club participants saw a facility nurse at least once a year for  
50  
51 450 their regular clinical check-up.

52  
53  
54  
55  
56 451  
57  
58  
59  
60

1  
2  
3 452 In the CLUBMEDS study, we will assess if a similar club-based intervention is feasible and  
4  
5 453 effective in improving BP control in the context of hypertension in Nigeria. Although the  
6  
7 454 CLUBMEDS strategy has the potential to address several barriers to adherence to anti-  
8  
9 455 hypertensive medications, this study has several limitations. First, this is study is a small  
10  
11 456 feasibility study and, as such, a convenient sample of 100 patients was chosen to be included  
12  
13 457 in the study. Second, the inclusion of both non-adherent and adherent patients in the study  
14  
15 458 might limit the efficacy of the intervention, as adherent patients might not benefit from the  
16  
17 459 intervention as much as non-adherent patients. Third, due to cultural norms, the presence of  
18  
19 460 both men and women as club members might interfere with how these people share their  
20  
21 461 challenges and concerns about adherence in the presence of people from the opposite sex in  
22  
23 462 the monthly club meetings. However, the post-implementation process evaluation will be able  
24  
25 463 to determine whether this was an interfering factor on the participation and success of the  
26  
27 464 CLUBMEDS strategy. Last, financial constraints, medication shortages and the lack of  
28  
29 465 pharmacists, pharmacist assistants, nurses or CHEWs responsible for pre-packing the  
30  
31 466 medications in the primary healthcare facilities might limit the scalability of this strategy to  
32  
33 467 other regions of Nigeria and other SSA countries.  
34  
35  
36  
37  
38  
39  
40  
41  
42  
43

44 469 If shown to be effective and acceptable to the patients and other stakeholders, the CLUBMEDS  
45  
46 470 strategy has the potential to change the current hypertension scenario, especially in resource-  
47  
48 471 limited settings like many SSA countries, including Nigeria. The CLUBMEDS strategy has the  
49  
50 472 potential of delivering a better care to patients with hypertension, by involving them, their  
51  
52 473 relatives and their communities in their healthcare. With this engagement, we aim to improve  
53  
54 474 the patients' knowledge about hypertension, encourage medication adherence and facilitate  
55  
56 475 medication delivering, bringing the medications closer to the patients.  
57  
58  
59  
60

1  
2  
3 4764  
5 477 **CONCLUSION**

6  
7  
8 478 With the growing burden of hypertension in Nigeria and other LMICs, a change in the current  
9  
10 479 model of hypertension management and treatment from the healthcare facility to community,  
11  
12 480 is imperative. If we are to achieve the '25 x 25' World Heart Federation and World Health  
13  
14 481 Organisation target of reducing premature cardiovascular disease mortality by 25% by 2025  
15  
16 482 worldwide, we need to accelerate our efforts in bringing anti-hypertensive treatment closer to  
17  
18 483 the population and ensure that at least 50% of eligible people are receiving medications to  
19  
20 484 prevent heart attacks and strokes. A club-based strategy, which was shown to be effective and  
21  
22 485 acceptable in the HIV/AIDS context, can similarly improve provision of care and treatment to  
23  
24 486 hypertensive patients in resource-limited areas in LMICs. The CLUBMEDS study aims to  
25  
26 487 evaluate a similar club-based strategy in patients with hypertension in Nigeria, where  
27  
28 488 hypertension awareness, treatment and control remains suboptimal. The CLUBMEDS pilot  
29  
30 489 study together with the formative and process qualitative evaluations will provide important  
31  
32 490 preliminary data on the potential implementation of this approach in the hypertension context.  
33  
34 491 If this strategy is shown to be feasible and acceptable, future studies may test the effectiveness  
35  
36 492 of this strategy to improve BP control and longer-term medication adherence in LMICs, such  
37  
38 493 as Nigeria. The CLUBMEDS findings will add to the body of evidence supporting adherence  
39  
40 494 clubs as a way to overcome barriers to optimal treatment adherence.  
41  
42  
43  
44  
45  
46  
47  
48  
49

50  
51 496 **DECLARATIONS**52  
53  
54 497 **Statement**  
55  
56  
57  
58  
59  
60

1  
2  
3 498 The Corresponding Author has the right to grant on behalf of all authors and does grant on  
4  
5 499 behalf of all authors, an exclusive licence on a worldwide basis to the BMJ Publishing Group  
6  
7  
8 500 Ltd and its Licensees to permit this article (if accepted) to be published in BMJ Open editions  
9  
10 501 and any other BMJPGJL products to exploit all subsidiary rights.  
11  
12

13 502

### 16 503 **Ethics approval**

18  
19 504 The study was approved by the Human Research Ethics Committees from the University of  
20  
21 505 Abuja Teaching Hospital (UATH/HREC/PR/2017/012/001) and the Federal Teaching Hospital  
22  
23 506 Abakaliki (FETHA/REC/VOL 2/2018/008) and all patients provided informed consent.  
24  
25  
26

27 507

### 30 508 **Competing interests**

31  
32 509 The authors declare no potential conflicts of interest with respect to the research, authorship  
33  
34 510 and/or publication of this article.  
35  
36  
37

38 511

### 41 512 **Funding**

42  
43  
44 513 The CLUBMEDS study is supported by a World Heart Federation Emerging Leaders  
45  
46 514 Programme pilot funding grant.  
47  
48

49 515

### 52 516 **Authors' contributors**

53  
54  
55 517 KS, GCI, EA, SRM, RP, LM, AO and SV conceived the original concept of the study and  
56  
57 518 obtained funding as a collaborative group during a one-week international seminar and  
58  
59 519 subsequent meetings through the World Heart Federation Emerging Leaders Programme. GCI,  
60

1  
2  
3 520 SBF, CU and AO are involved in the data acquisition locally in Nigeria. KS drafted the  
4  
5 521 manuscript. All authors critically revised the manuscript and approved the final manuscript.  
6  
7  
8  
9 522

10  
11  
12 523 **Acknowledgments**  
13  
14

15 524 The authors thank World Heart Federation Emerging Leaders Programme and Committee who  
16  
17 525 supported and peer-reviewed the content of this research. In particular, the authors thank Mark  
18  
19 526 Huffman, Pablo Perel and Karen Sliwa for their support and enthusiasm. The authors also thank  
20  
21 527 the local staff at the rural and urban primary healthcare facilities for their engagement in this  
22  
23 528 research.  
24  
25  
26  
27

28 529

29  
30  
31 530 **REFERENCES**  
32  
33

- 34 531 1. Abajobir AA, Abate KH, Abbafati C, Abbas KM, Abd-Allah F, Abdulle AM, Abera  
35 532 SF, Aboyans V, Abu-Raddad LJ, Abu-Rmeileh NME *et al*: **Global, regional, and**  
36 533 **national comparative risk assessment of 84 behavioural, environmental and**  
37 534 **occupational, and metabolic risks or clusters of risks, 1990–2016: a systematic**  
38 535 **analysis for the Global Burden of Disease Study 2016.** *The Lancet* 2017,  
39 536 **390(10100):1345-1422.**  
40 537 2. Mills KT, Bundy JD, Kelly TN, Reed JE, Kearney PM, Reynolds K, Chen J, He J:  
41 538 **Global Disparities of Hypertension Prevalence and Control: A Systematic**  
42 539 **Analysis of Population-Based Studies From 90 Countries.** *Circulation* 2016,  
43 540 **134(6):441-450.**  
44 541 3. Ataklte F, Erqou S, Kaptoge S, Taye B, Echouffo-Tcheugui JB, Kengne AP: **Burden**  
45 542 **of undiagnosed hypertension in sub-saharan Africa: a systematic review and**  
46 543 **meta-analysis.** *Hypertension* 2015, **65(2):291-298.**  
47 544 4. Echouffo-Tcheugui JB, Kengne AP, Erqou S, Cooper RS: **High Blood Pressure in**  
48 545 **Sub-Saharan Africa: The Urgent Imperative for Prevention and Control.** *The*  
49 546 *Journal of Clinical Hypertension* 2015, **17(10):751-755.**  
50 547 5. de-Graft Aikins A, Unwin N, Agyemang C, Allotey P, Campbell C, Arhinful D:  
51 548 **Tackling Africa's chronic disease burden: from the local to the global.**  
52 549 *Globalization and Health* 2010, **6(1):5.**  
53 550 6. **National Population Estimates: Population 2006-2016.** Nigerian National Bureau  
54 551 of Statistics; 2016. Available from:  
55 552 <http://nigerianstat.gov.ng/elibrary?page=36&offset=350> accessed 1st June 2018.  
56  
57  
58  
59  
60

- 1  
2  
3 553 7. Ogah OS, Okpechi I, Chukwuonye, II, Akinyemi JO, Onwubere BJ, Falase AO,  
4 554 Stewart S, Sliwa K: **Blood pressure, prevalence of hypertension and hypertension**  
5 555 **related complications in Nigerian Africans: A review.** *World J Cardiol* 2012,  
6 556 4(12):327-340.
- 7 557 8. Ogedegbe G: **Barriers to optimal hypertension control.** *J Clin Hypertens*  
8 558 *(Greenwich)* 2008, 10(8):644-646.
- 9 559 9. Siegel D: **Barriers to and Strategies for Effective Blood Pressure Control.**  
10 560 *Vascular Health and Risk Management* 2005, 1(1):9-14.
- 11 561 10. Okwuonu CG, Ojimadu NE, Okaka EI, Akemokwe FM: **Patient-related barriers to**  
12 562 **hypertension control in a Nigerian population.** *International Journal of General*  
13 563 *Medicine* 2014, 7:345-353.
- 14 564 11. Odusola AO, Hendriks M, Schultsz C, Bolarinwa OA, Akande T, Osibogun A,  
15 565 Agyemang C, Ogedegbe G, Agbede K, Adenusi P *et al*: **Perceptions of inhibitors**  
16 566 **and facilitators for adhering to hypertension treatment among insured patients**  
17 567 **in rural Nigeria: a qualitative study.** *BMC Health Serv Res* 2014, 14:624.
- 18 568 12. Jain Y, Jain P: **Communitisation of healthcare: peer support groups for chronic**  
19 569 **disease care in rural India.** *Bmj* 2018, 360:k85.
- 20 570 13. **Reaching closer to home: Progress implementing community-based and other**  
21 571 **adherence strategies supporting people on HIV treatment.** Medicins Sans  
22 572 Frontières & Southern Africa Medical Unit (SAMU); 2013 [updated 3 December  
23 573 2013]. Available from: [https://samumsf.org/sites/default/files/2017-](https://samumsf.org/sites/default/files/2017-07/5_eng_reaching_closer_to_home_2013.pdf)  
24 574 [07/5\\_eng\\_reaching\\_closer\\_to\\_home\\_2013.pdf](https://samumsf.org/sites/default/files/2017-07/5_eng_reaching_closer_to_home_2013.pdf) accessed 1st June 2018.
- 25 575 14. Wilkinson LS: **ART adherence clubs: A long-term retention strategy for clinically**  
26 576 **stable patients receiving antiretroviral therapy.** *Southern African Journal of HIV*  
27 577 *Medicine; Vol 14, No 2 (2013)* 2013.
- 28 578 15. **Community-based antiretroviral therapy delivery: experiences from MSF.** Joint  
29 579 United Nations Programme on HI/AIDS (UNAIDS) and Medicins Sans Frontières;  
30 580 2015 [updated 20 April 2015]. Available from:  
31 581 [http://www.unaids.org/en/resources/documents/2015/20150420\\_MSF\\_UNAIDS\\_JC2](http://www.unaids.org/en/resources/documents/2015/20150420_MSF_UNAIDS_JC2707)  
32 582 [707](http://www.unaids.org/en/resources/documents/2015/20150420_MSF_UNAIDS_JC2707) accessed 1st June 2018.
- 33 583 16. **ART adherence club: Report and Toolkit.** Medicins Sans Frontières; 2014 [updated  
34 584 October 2014]. Available from: [https://samumsf.org/sites/default/files/2017-07/ART-](https://samumsf.org/sites/default/files/2017-07/ART-Adherence-Club-REPORT-and-TOOLKIT_OCT2014.pdf)  
35 585 [Adherence-Club-REPORT-and-TOOLKIT\\_OCT2014.pdf](https://samumsf.org/sites/default/files/2017-07/ART-Adherence-Club-REPORT-and-TOOLKIT_OCT2014.pdf) accessed 1st June 2018.
- 36 586 17. Grimsrud A, Sharp J, Kalombo C, Bekker L-G, Myer L: **Implementation of**  
37 587 **community-based adherence clubs for stable antiretroviral therapy patients in**  
38 588 **Cape Town, South Africa.** *Journal of the International AIDS Society* 2015,  
39 589 18(1):19984.
- 40 590 18. Luque-Fernandez MA, Van Cutsem G, Goemaere E, Hilderbrand K, Schomaker M,  
41 591 Mantangana N, Mathee S, Dubula V, Ford N, Hernan MA *et al*: **Effectiveness of**  
42 592 **patient adherence groups as a model of care for stable patients on antiretroviral**  
43 593 **therapy in Khayelitsha, Cape Town, South Africa.** *PloS one* 2013, 8(2):e56088.
- 44 594 19. Bango F, Ashmore J, Wilkinson L, van Cutsem G, Cleary S: **Adherence clubs for**  
45 595 **long-term provision of antiretroviral therapy: cost-effectiveness and access**  
46 596 **analysis from Khayelitsha, South Africa.** *Tropical medicine & international health*  
47 597 *: TM & IH* 2016, 21(9):1115-1123.
- 48 598 20. Population in Abakaliki city. 2006. Available from:  
49 599 <https://en.wikipedia.org/wiki/Abakaliki> accessed 18 October 2018.
- 50 600 21. Population in Abakaliki Local Government Area. 2006. Available from:  
51 601 <https://www.citypopulation.de/php/nigeria-admin.php?adm2id=NGA011001> accessed  
52 602 18 October 2018.

- 1  
2  
3 603 22. Population in Oyi Local Government Area. 2006. Available from:  
4 604 <https://www.citypopulation.de/php/nigeria-admin.php?adm2id=NGA004021> accessed  
5 605 18 October 2018.
- 6 606 23. Decroo T, Rasschaert F, Telfer B, Remartinez D, Laga M, Ford N: **Community-**  
7 607 **based antiretroviral therapy programs can overcome barriers to retention of**  
8 608 **patients and decongest health services in sub-Saharan Africa: a systematic**  
9 609 **review**. *International health* 2013, **5**(3):169-179.
- 10 610 24. Haberer JE, Sabin L, Amico KR, Orrell C, Galárraga O, Tsai AC, Vreeman RC,  
11 611 Wilson I, Sam-Agudu NA, Blaschke TF *et al*: **Improving antiretroviral therapy**  
12 612 **adherence in resource-limited settings at scale: a discussion of interventions and**  
13 613 **recommendations**. *Journal of the International AIDS Society* 2017, **20**(1):21371.
- 14 614 25. Luque-Fernandez MA, Van Cutsem G, Goemaere E, Hilderbrand K, Schomaker M,  
15 615 Mantangana N, Mathee S, Dubula V, Ford N, Hernán MA *et al*: **Effectiveness of**  
16 616 **Patient Adherence Groups as a Model of Care for Stable Patients on**  
17 617 **Antiretroviral Therapy in Khayelitsha, Cape Town, South Africa**. *PLOS ONE*  
18 618 2013, **8**(2):e56088.
- 19 619 26. Bango F WL, Van Cutsem G, Cleary S: **Cost-effectiveness of ART adherence clubs**  
20 620 **for long-term management of clinically stable ART patients**. In: *International*  
21 621 *Conference on AIDS and STIs in Africa (ICASA 2013)*. Cape Town, South Africa;  
22 622 2013.

23 623  
24  
25  
26  
27  
28  
29  
30 624 **Figure 1: A model of club-based medication delivery strategy in hypertension context**  
31  
32 625 **from CLUBMEDS Study being implemented in Nigeria**

33  
34  
35 626 Note: P refers to a patient or club member.  
36  
37  
38  
39  
40  
41  
42  
43  
44  
45  
46  
47  
48  
49  
50  
51  
52  
53  
54  
55  
56  
57  
58  
59  
60

1  
2  
3  
4  
5  
6  
7  
8  
9  
10  
11  
12  
13  
14  
15  
16  
17  
18  
19  
20  
21  
22  
23  
24  
25  
26  
27  
28  
29  
30  
31  
32  
33  
34  
35  
36  
37  
38  
39  
40  
41  
42  
43  
44  
45  
46  
47  
48  
49  
50  
51  
52  
53  
54  
55  
56  
57  
58  
59  
60

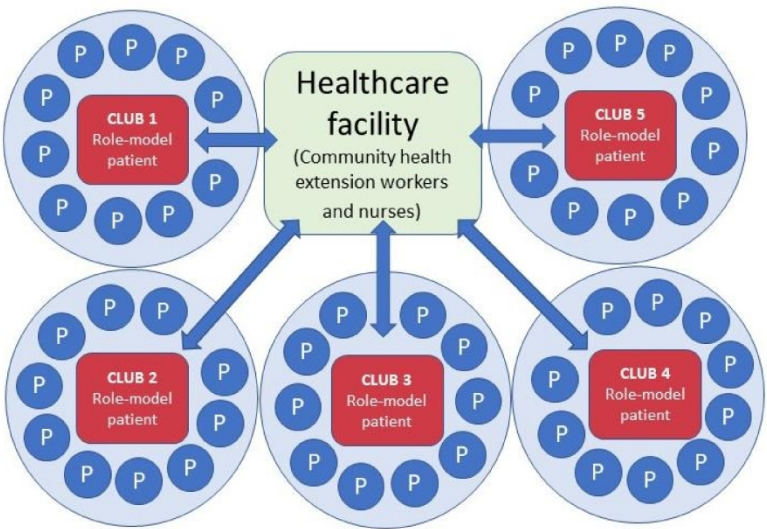

Figure 1: A model of club-based medication delivery strategy in hypertension context from CLUBMEDS Study being implemented in Nigeria

297x210mm (300 x 300 DPI)
